# Supplementary material for: KSHV vIL-6 promotes SIRT3-induced deacetylation of SERBP1 to inhibit ferroptosis and enhance cellular transformation by inducing lipoyltransferase 2 mRNA degradation
Source: PubMed Central journal article supplement (PMC10959363; doi:10.1371/journal.ppat.1012082), 2024-03-12

**Figure 1D**

Ace-EIF4G1

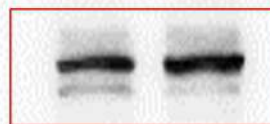

EIF4G1

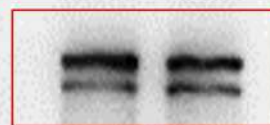

Ace-EEF1A1

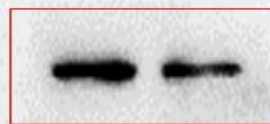

EEF1A1

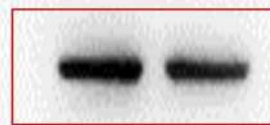

Ace-GDPD3

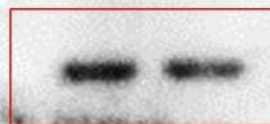

GDPD3

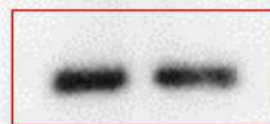

Ace-CTNNA1

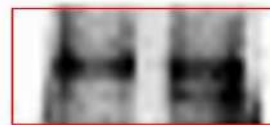

CTNNA1

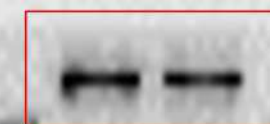

Ace-SERBP1

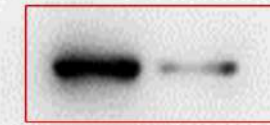

SERBP1

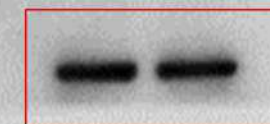

**Figure 1E**

SERBP1

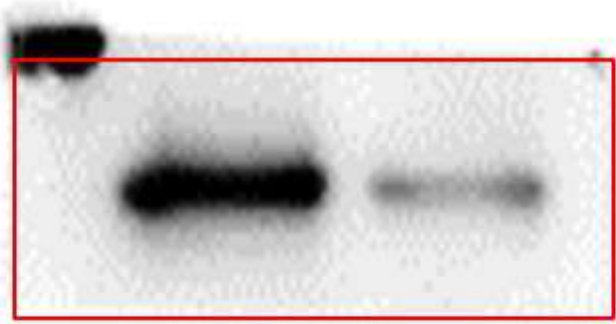

Heavy chain

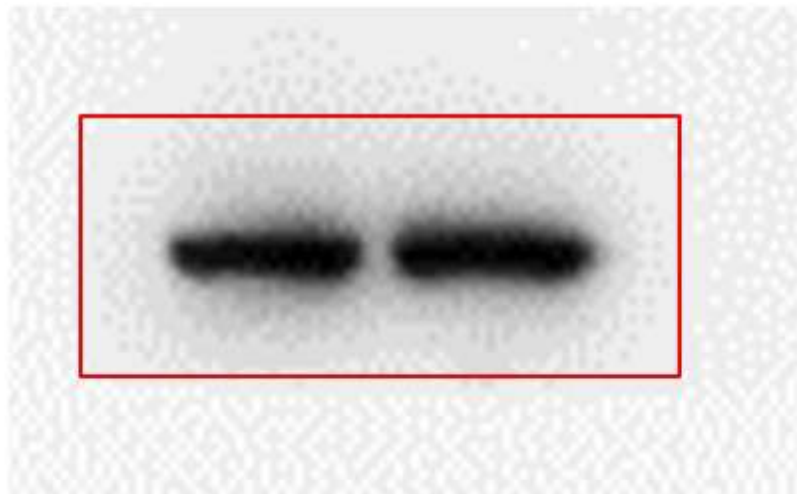

SERBP1

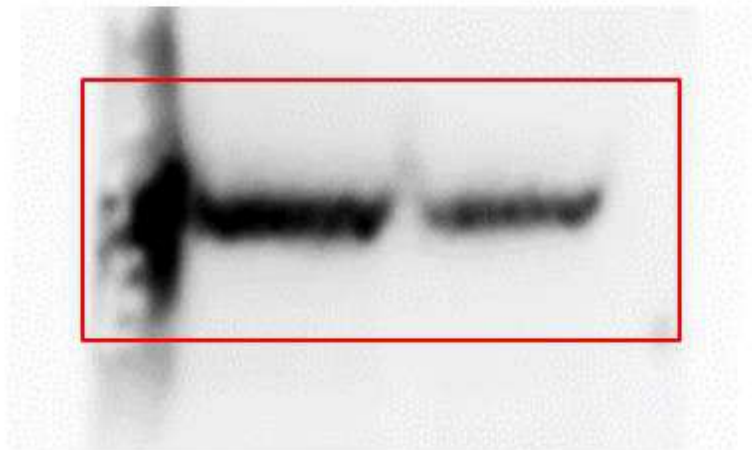

GAPDH

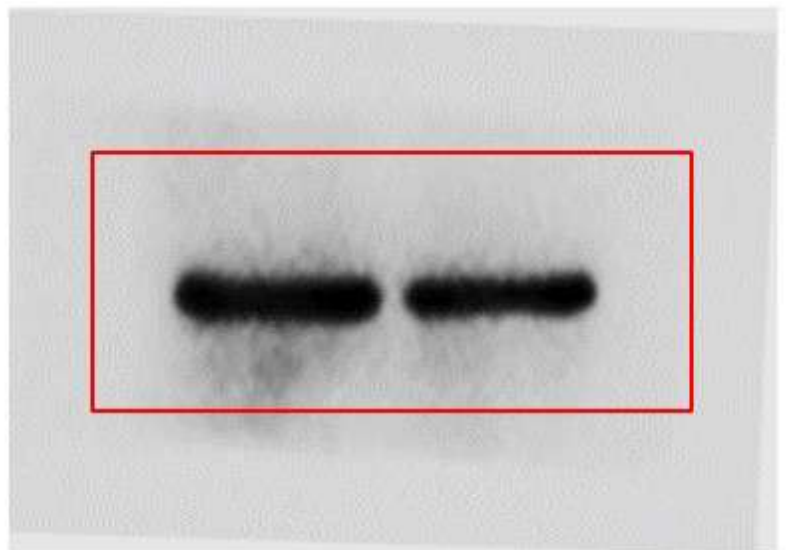

**Figure 1F**

Ace-SERBP1

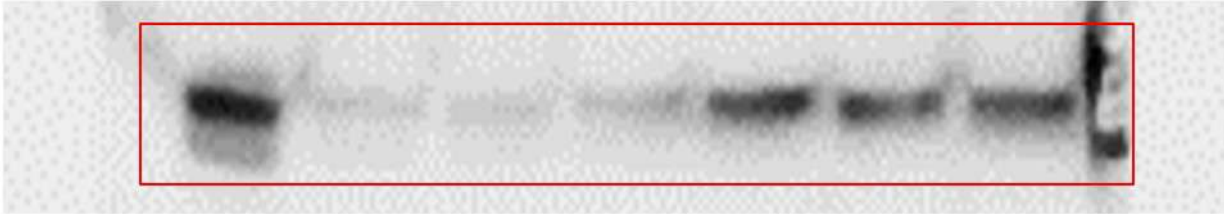

Anti-Myc

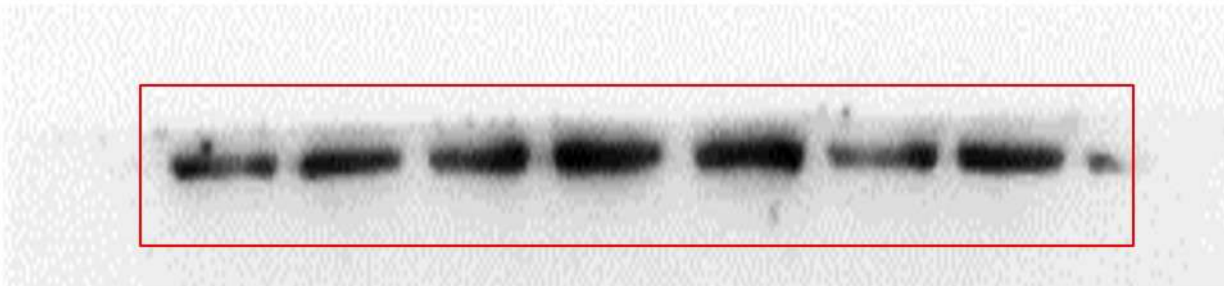

Light chain

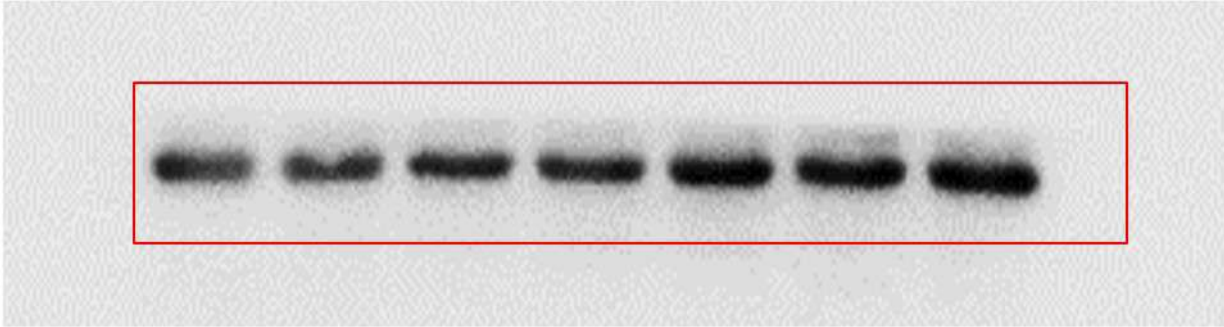

Anti-Myc

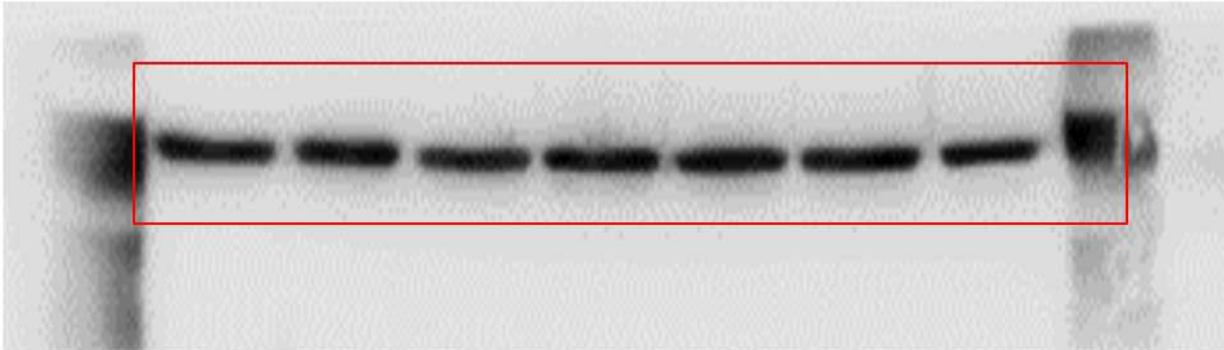

GAPDH

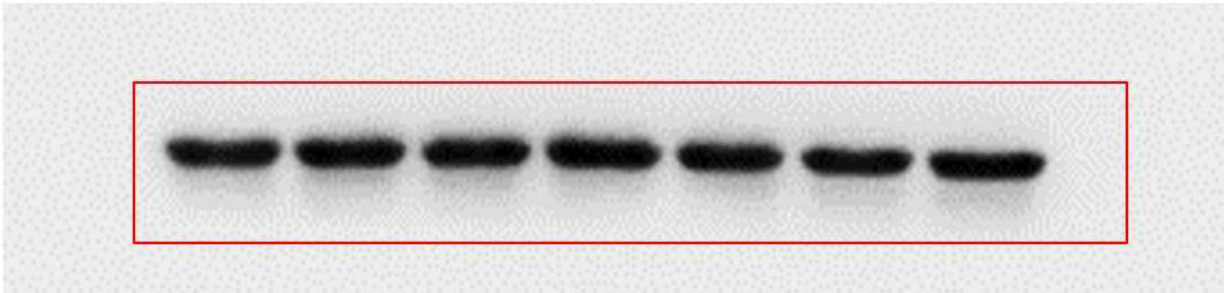

**Figure 1G**

Cas9-Flag

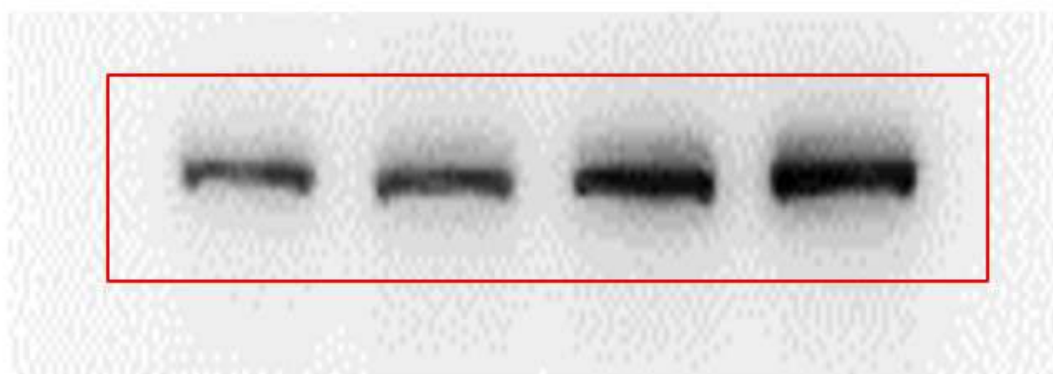

SERBP1

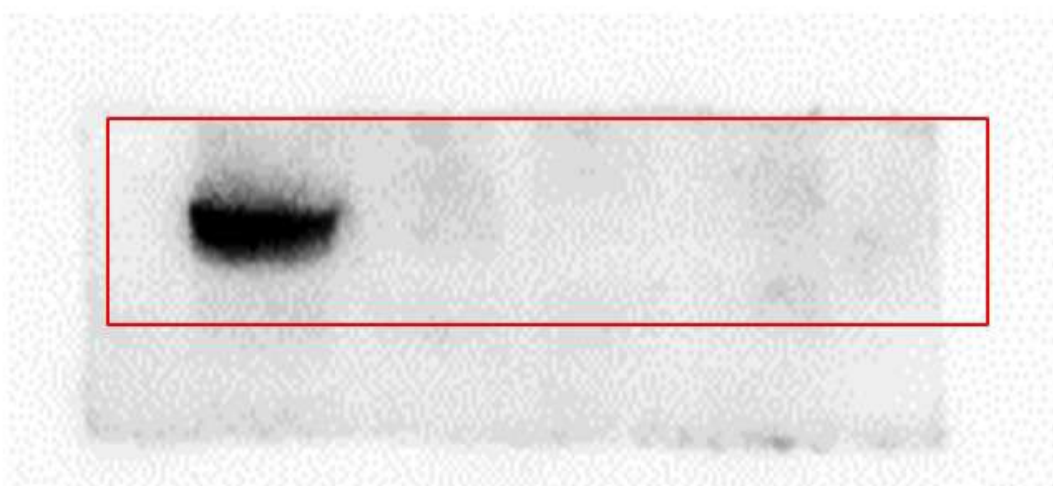

GAPDH

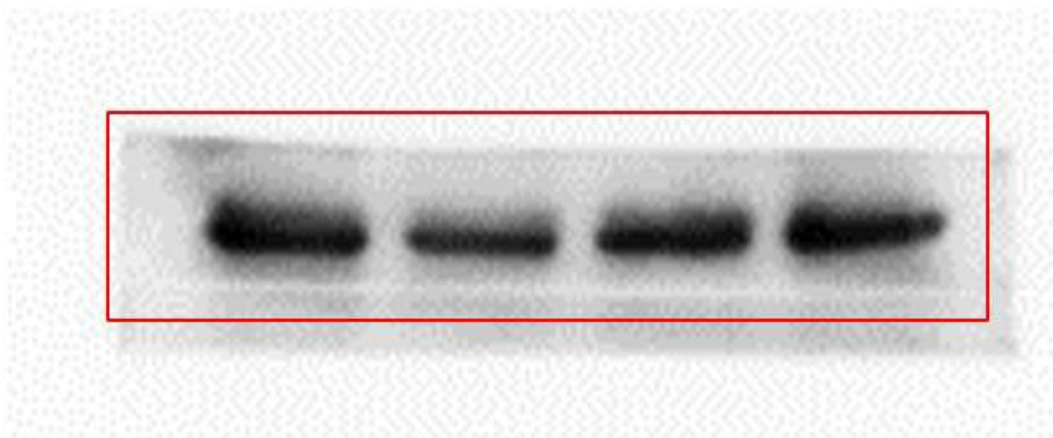

**Figure 1L**

Anti-Myc

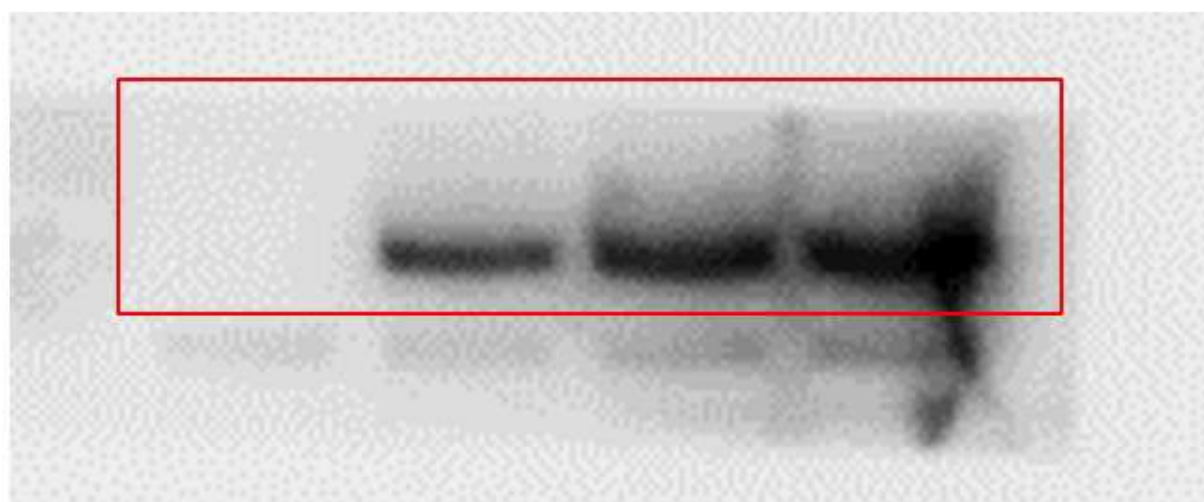

GAPDH

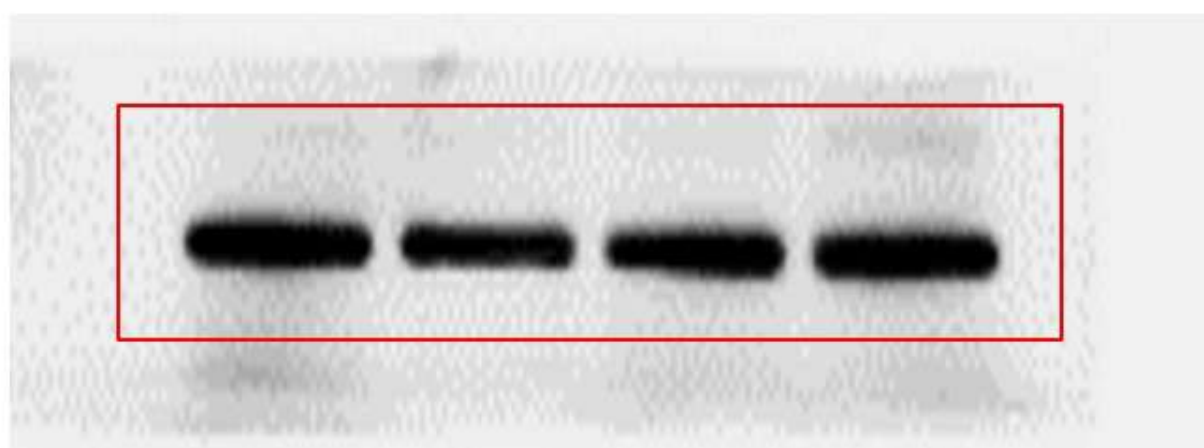

# Figure 2E

ACSL4

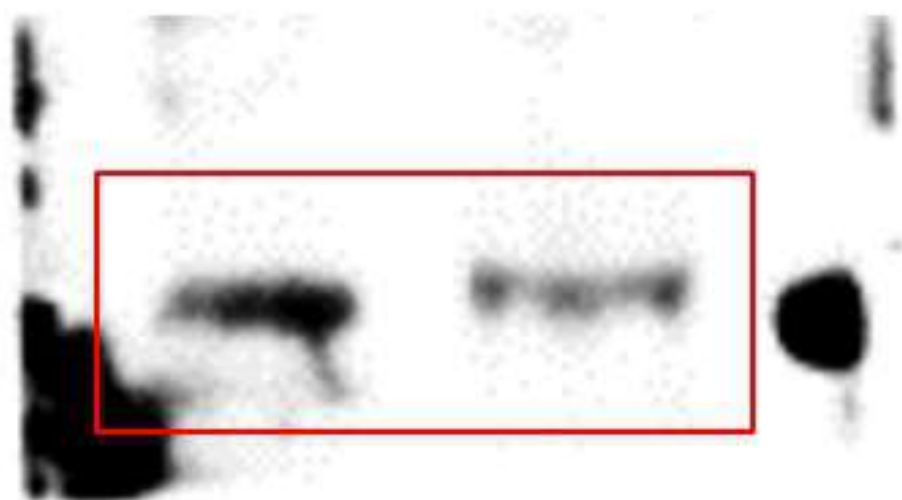

FTH1

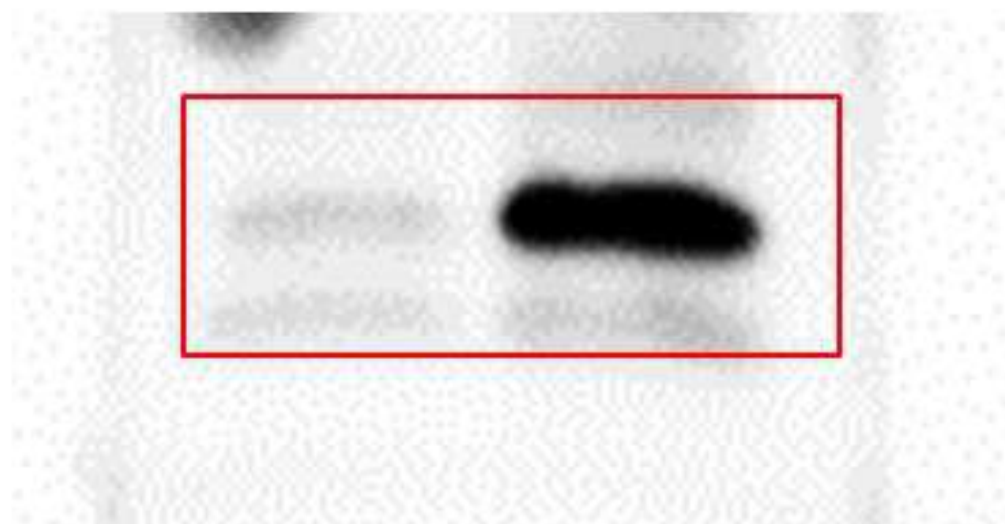

Tubulin

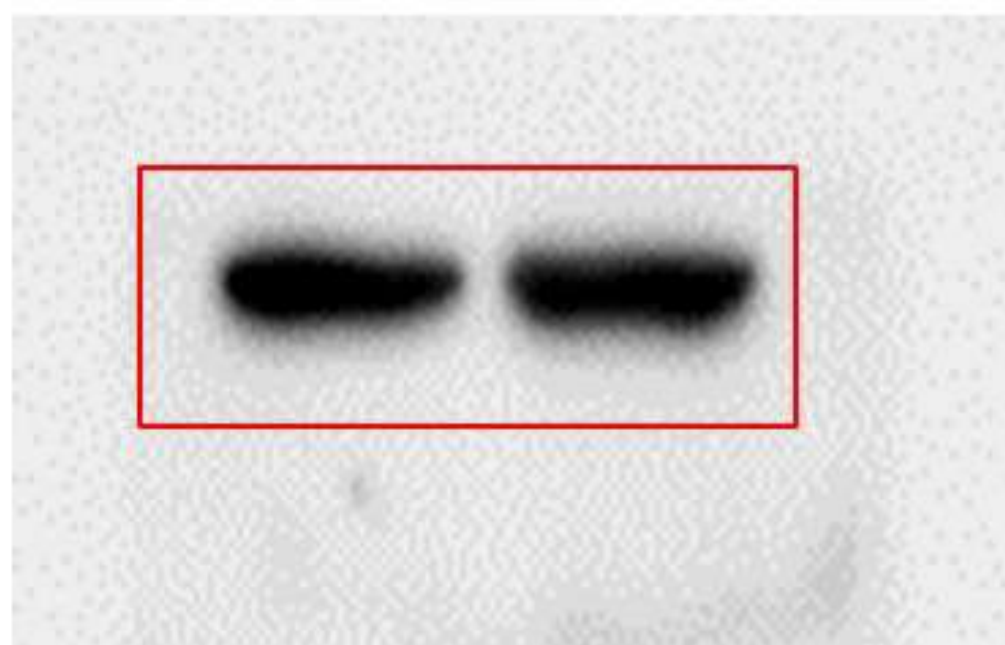

**Figure 2J**

ACSL4

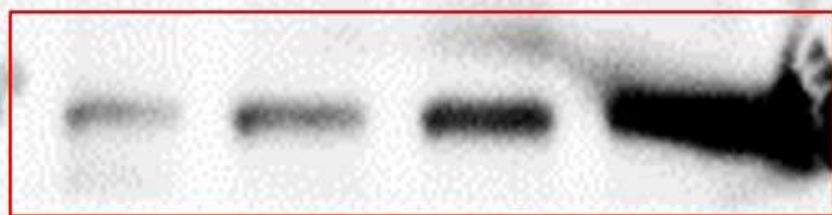

FTH1

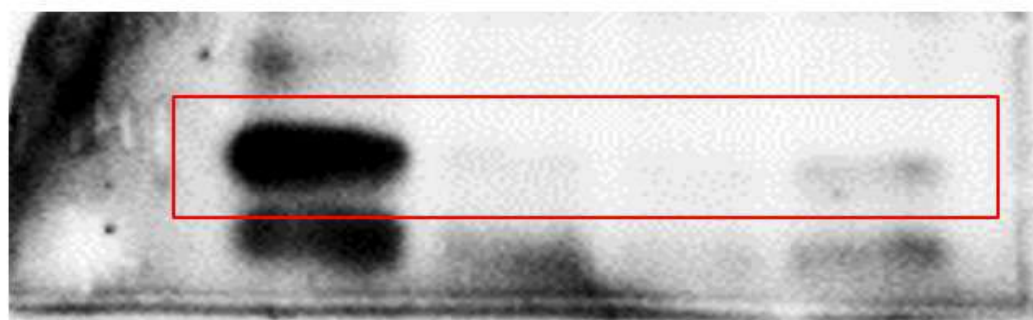

Tubulin

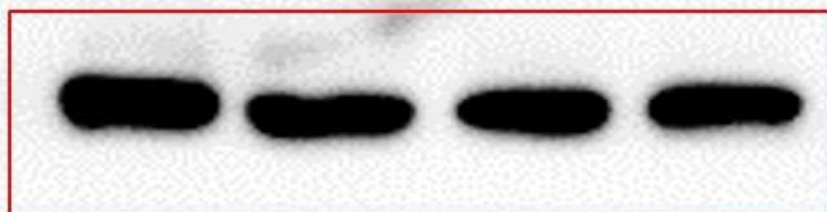

Figure 3A

SERBP1

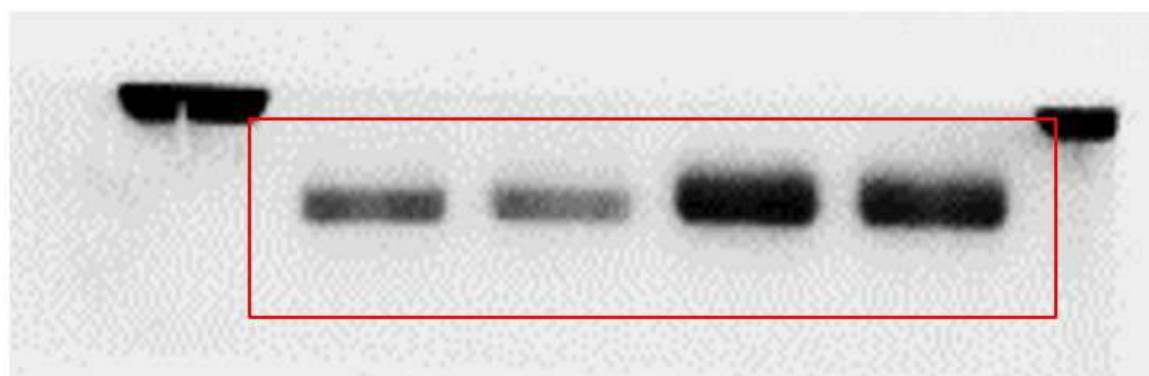

Light chain

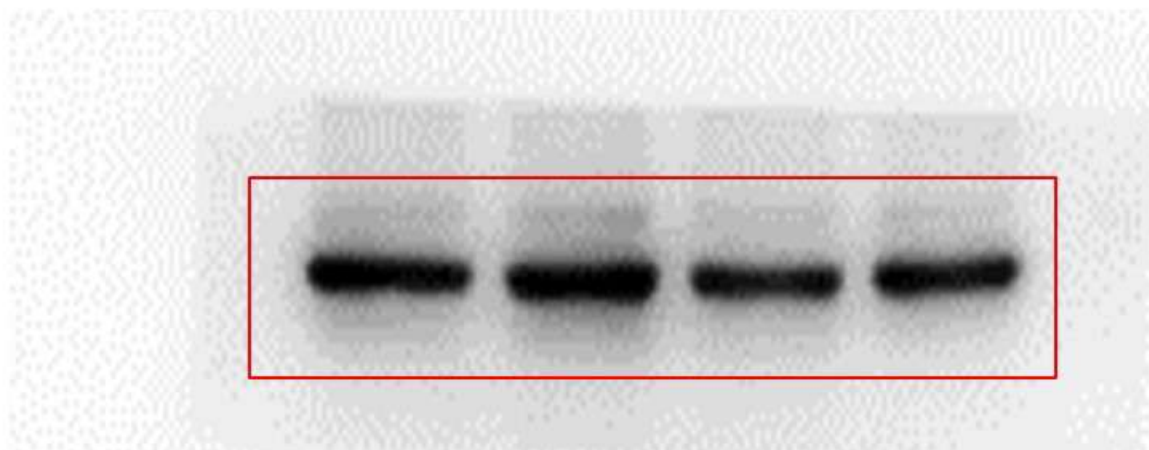

SERBP1

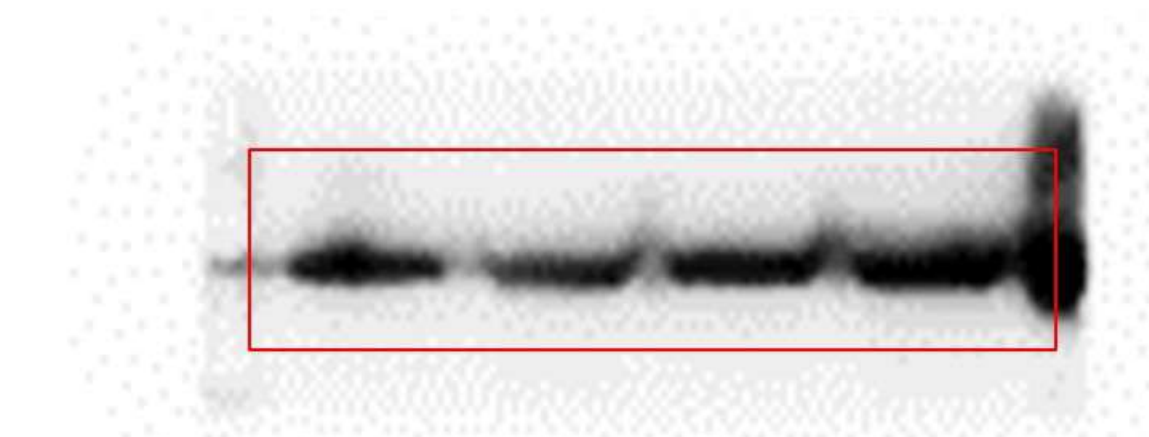

GAPDH

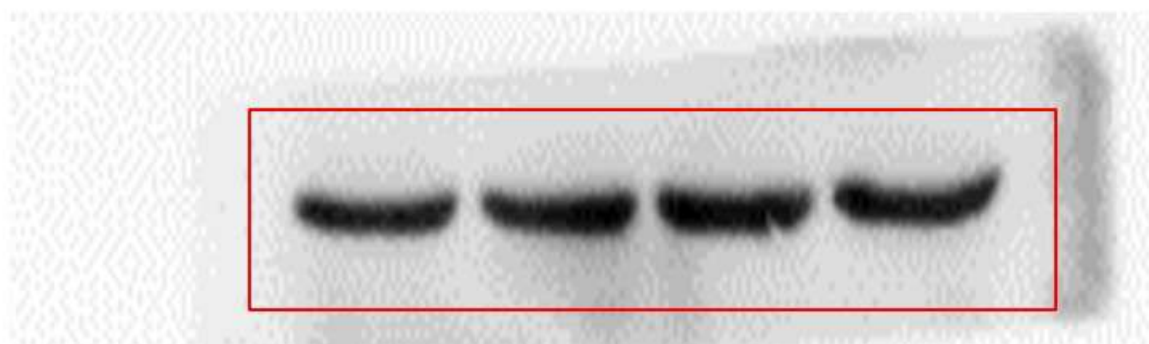



**Figure 3B**

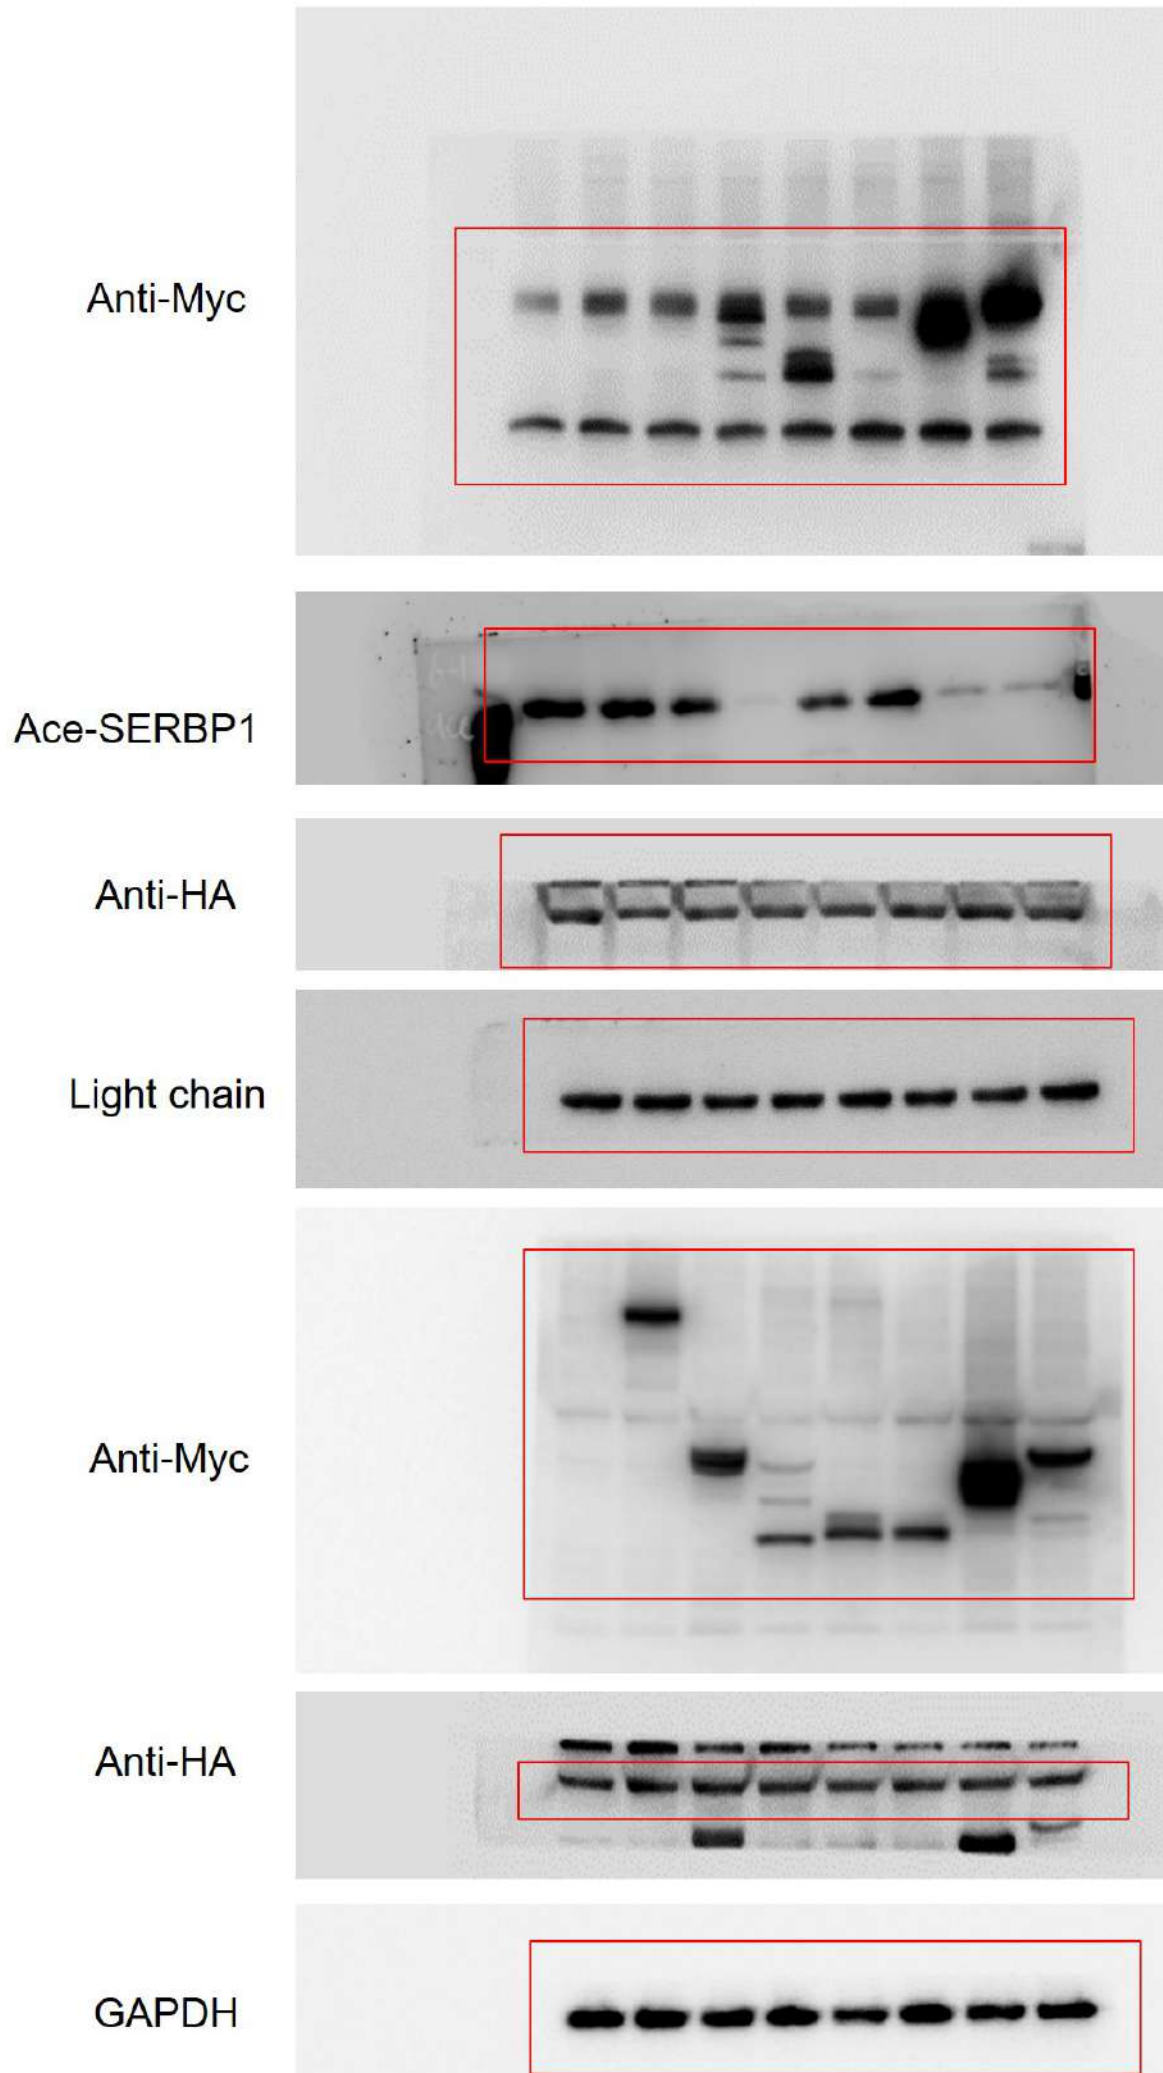

**Figure 3C**

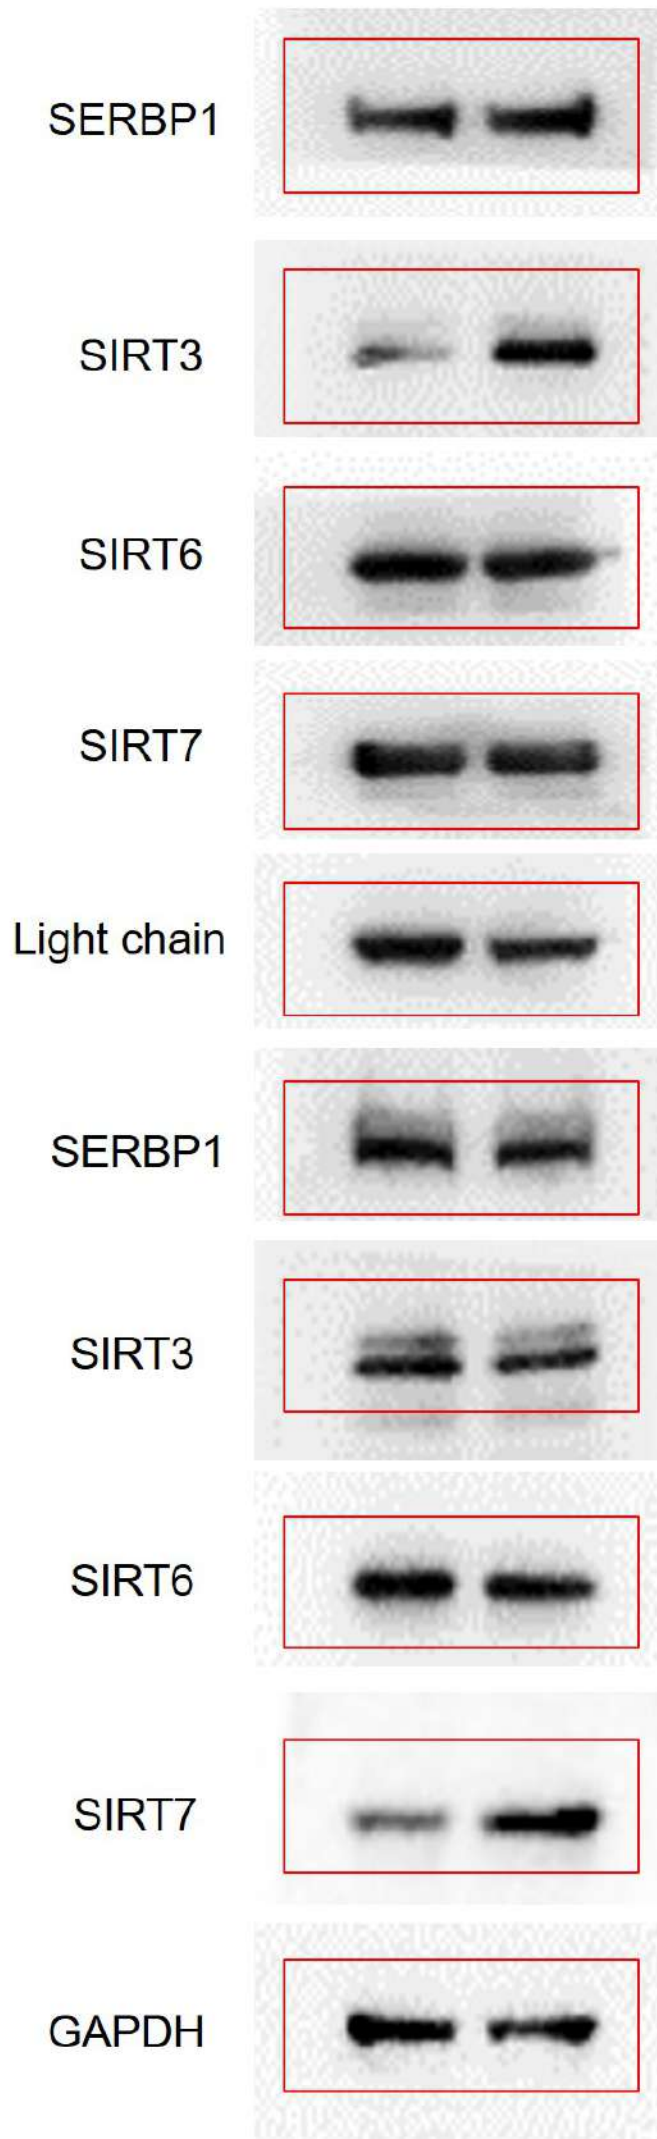

**Figure 3D**

SERBP1

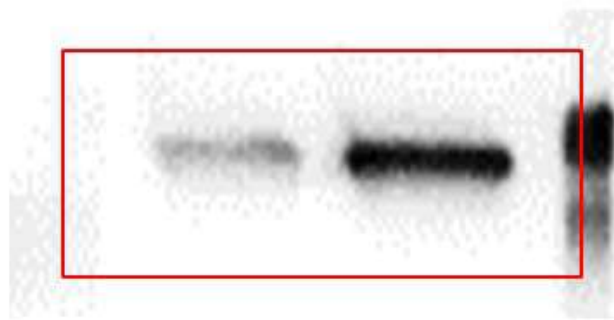

SIRT3

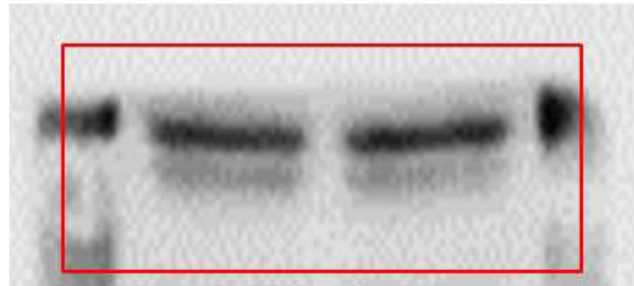

Light chain

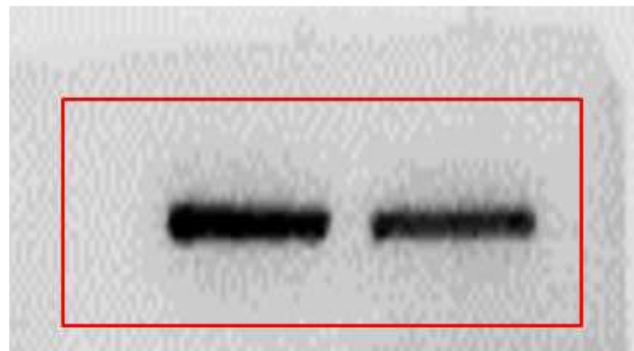

SERBP1

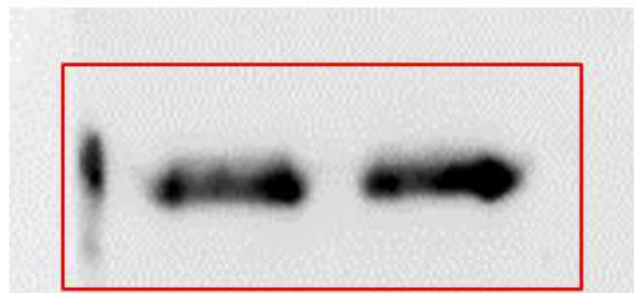

SIRT3

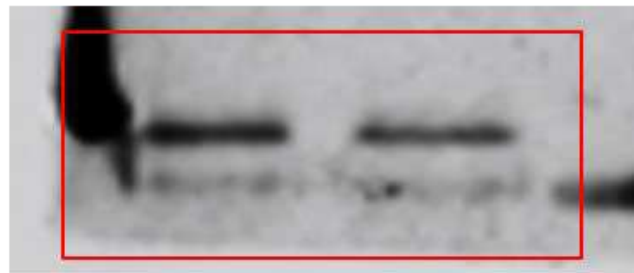

GAPDH

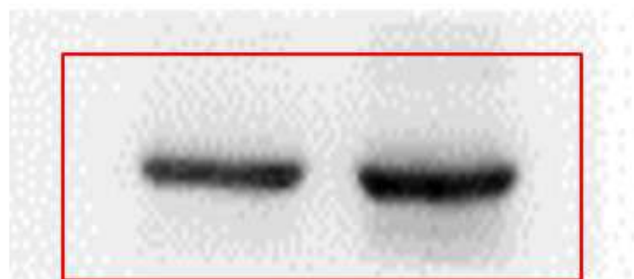

**Figure 3E**

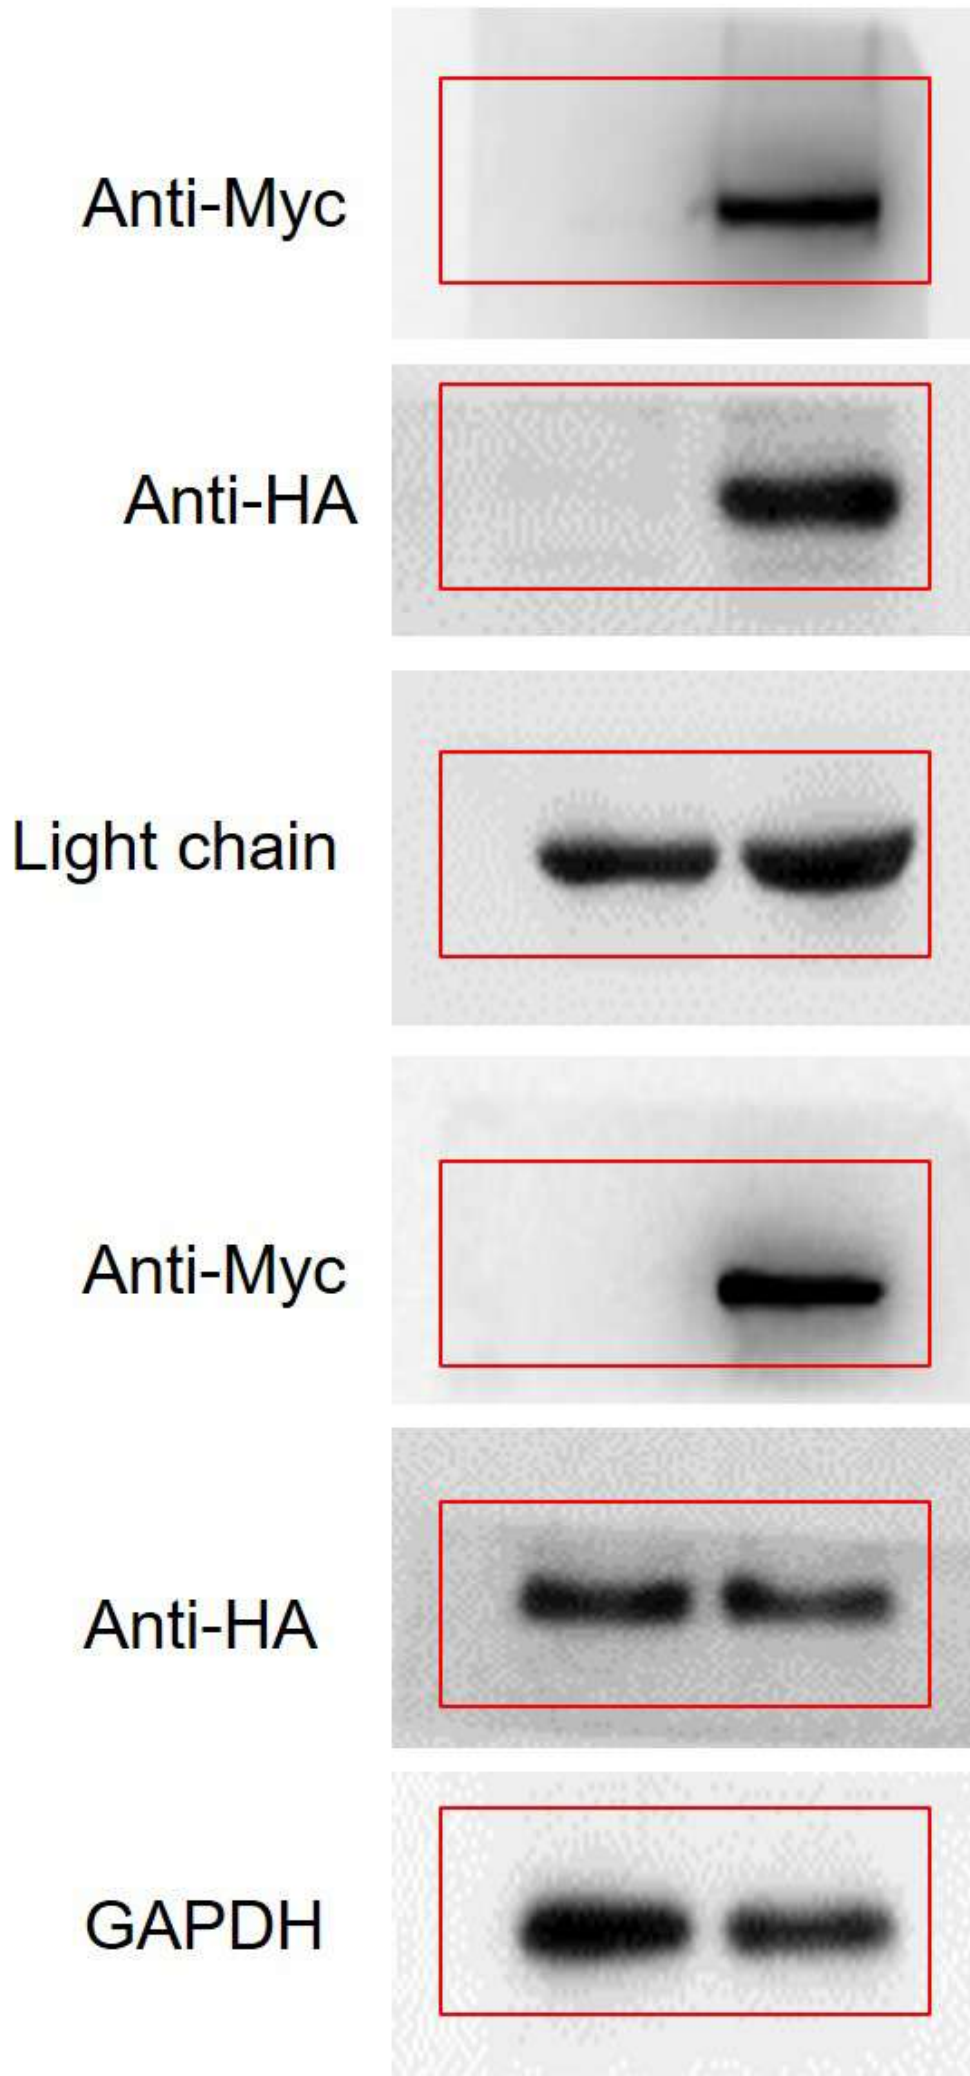

**Figure 3F**

Anti-HA

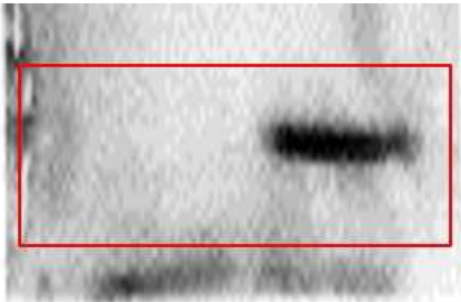

Anti-Myc

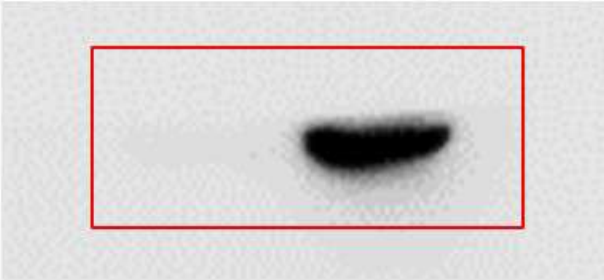

Light chain

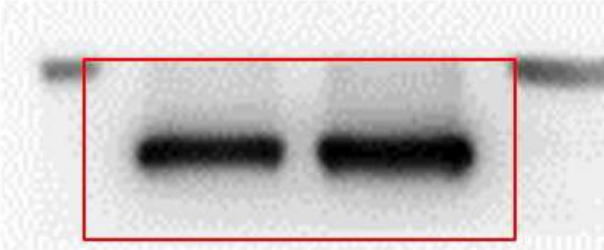

Anti-Myc

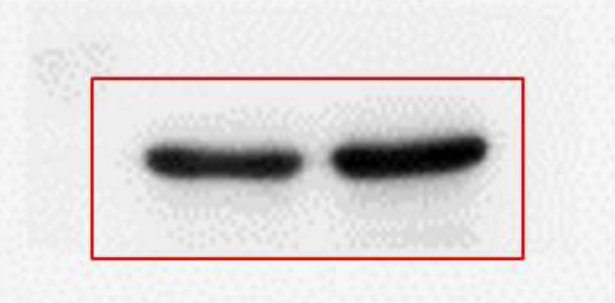

Anti-HA

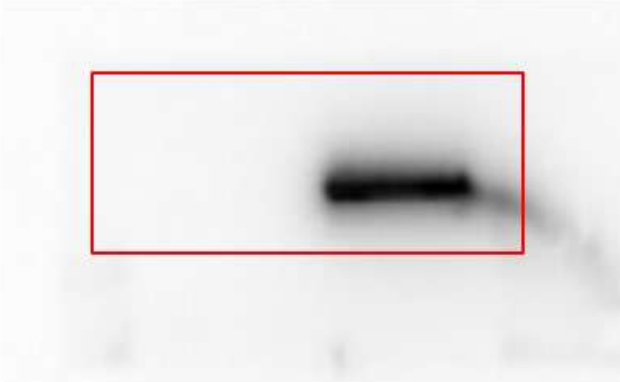

GAPDH

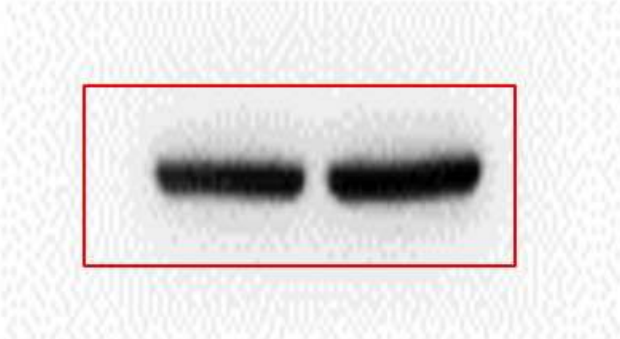

**Figure 4A**

Cas9-Flag

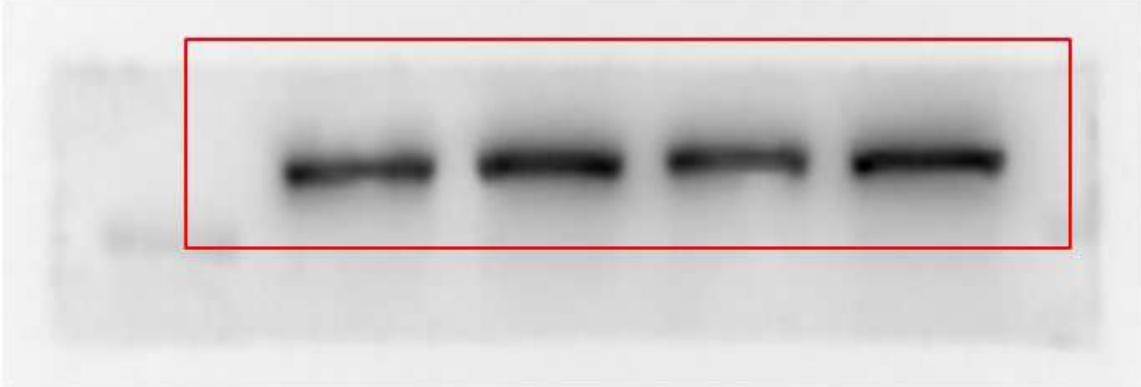

SIRT3

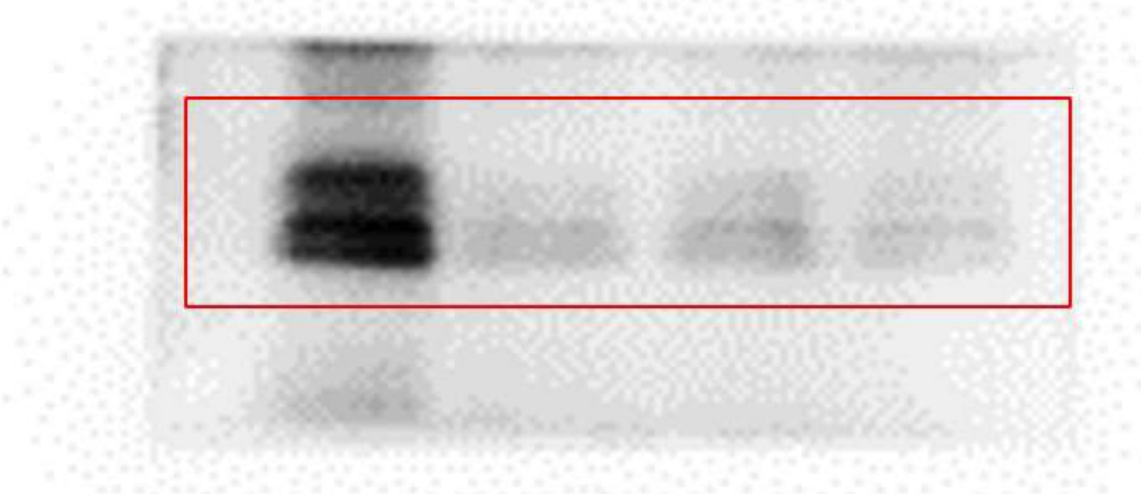

GAPDH

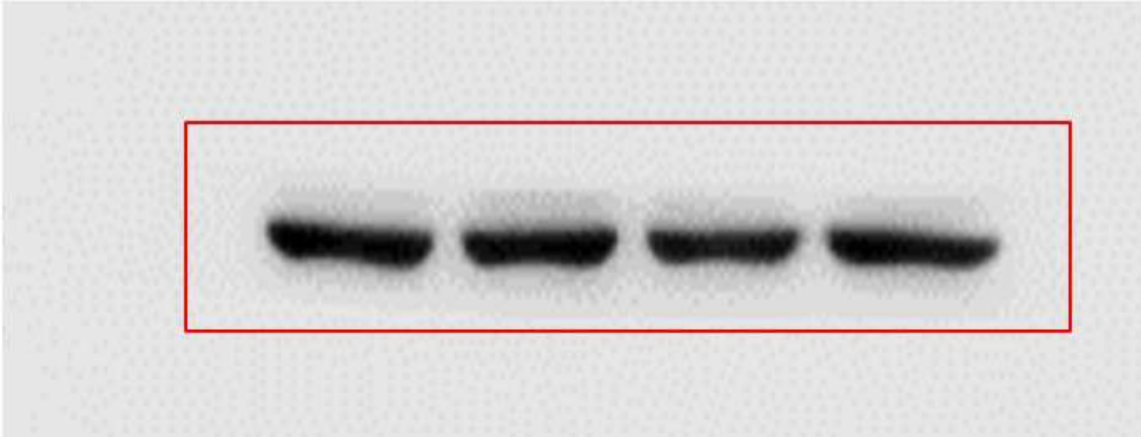

**Figure 4B**

Ace-SERBP1

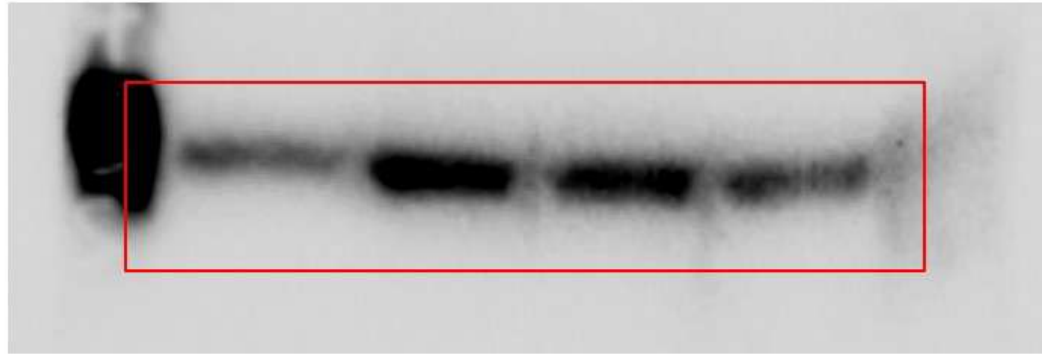

SERBP1

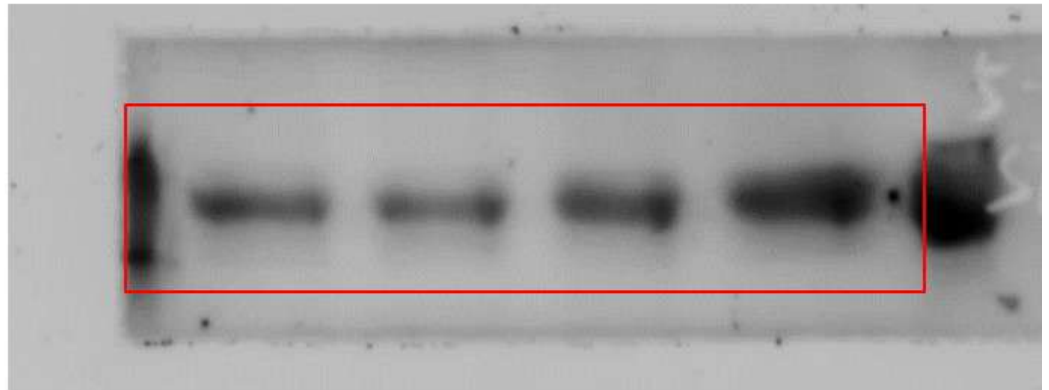

SERBP1

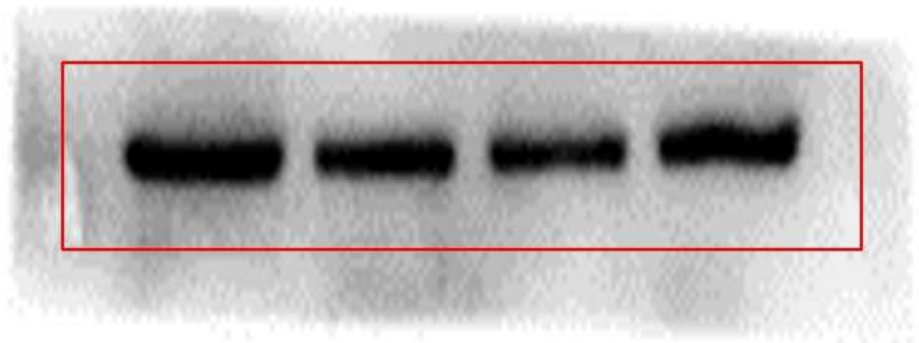

SIRT3

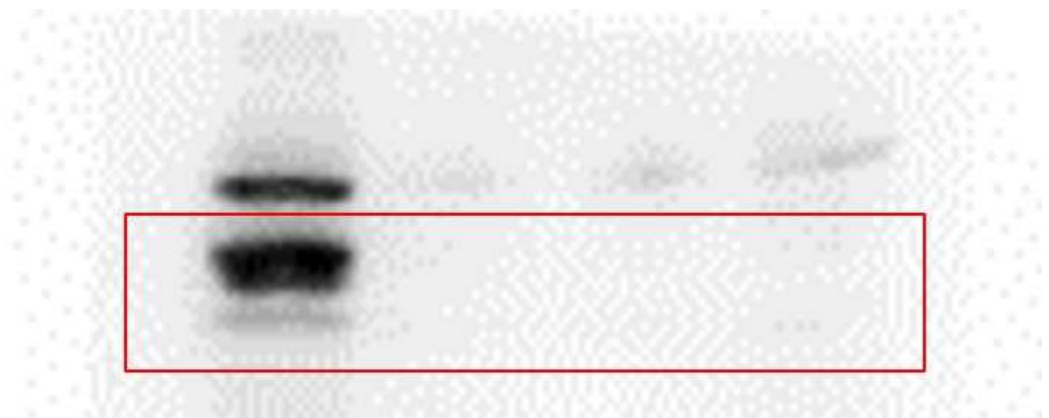

GAPDH

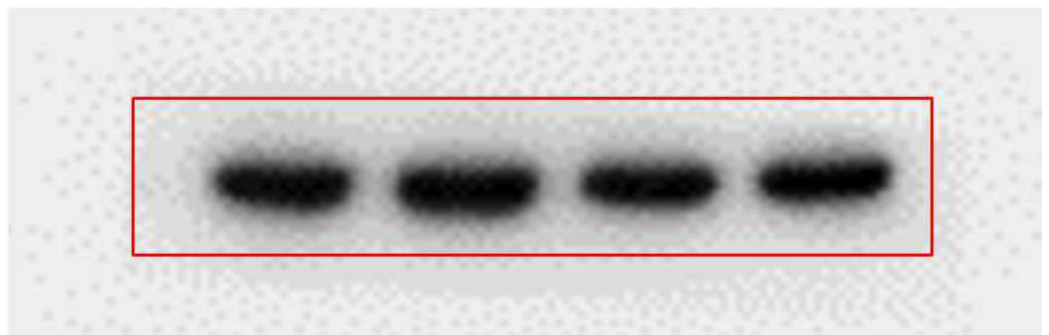

**Figure 4G**

ACSL4

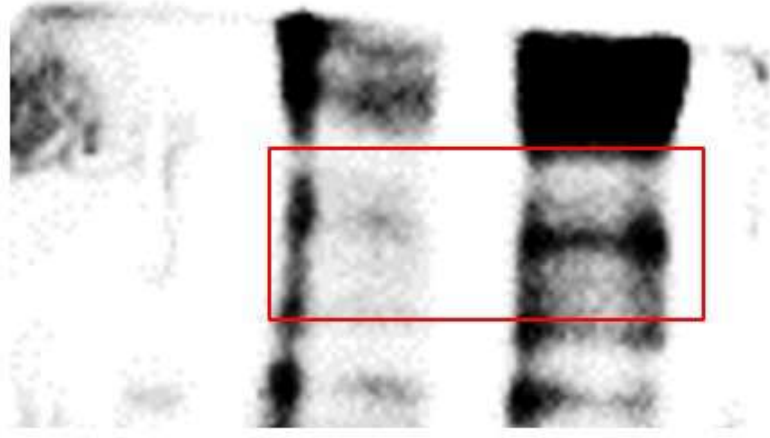

FTH1

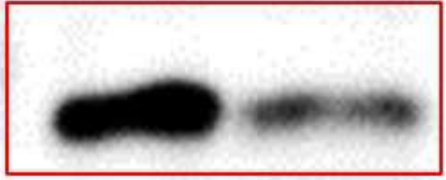

Tubulin

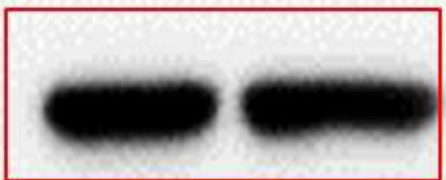



**Figure 4J**

Ace-SERBP1

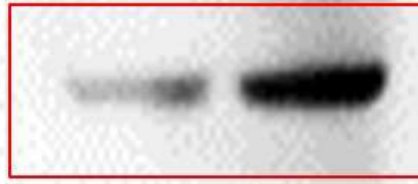

SERBP1

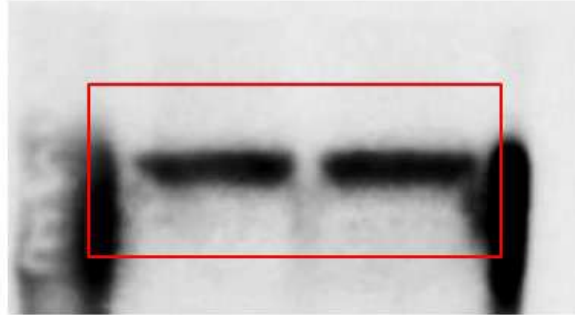

Light chain

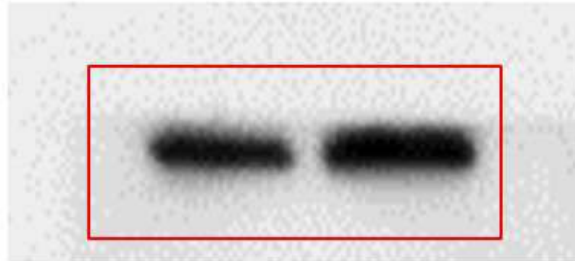

SERBP1

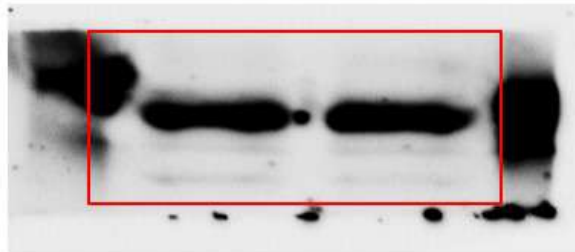

SIRT3

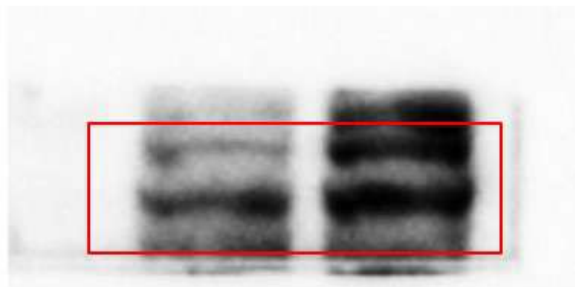

Tubulin

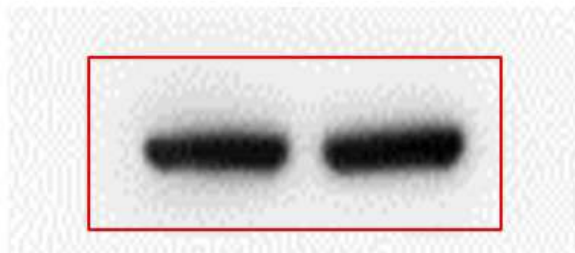

GAPDH

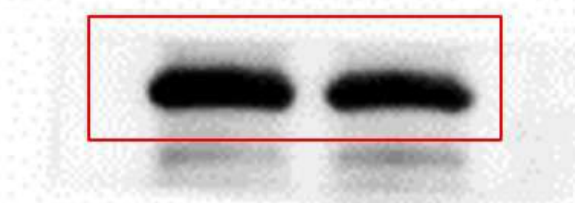

**Figure 4K**

SERBP1

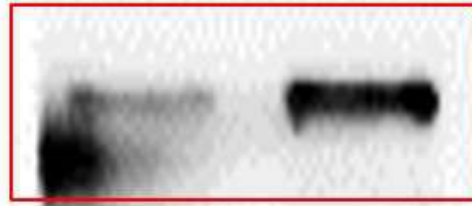

Light chain

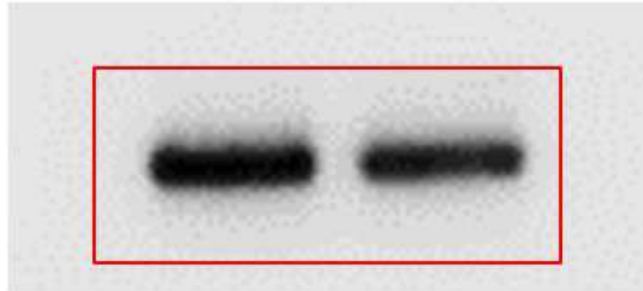

SERBP1

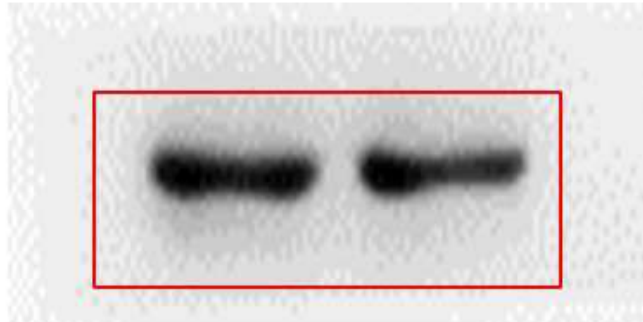

SIRT3

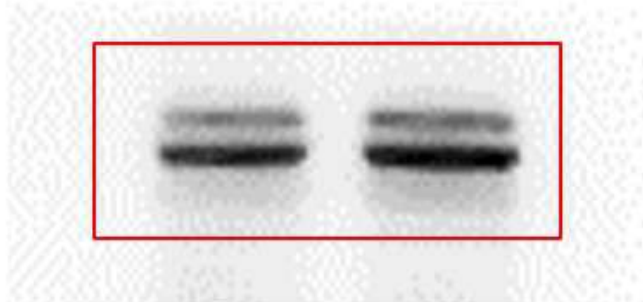

Tubulin

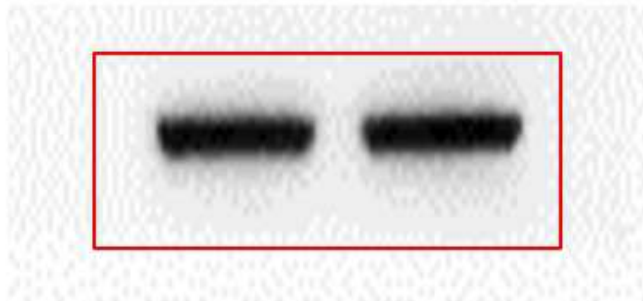

GAPDH

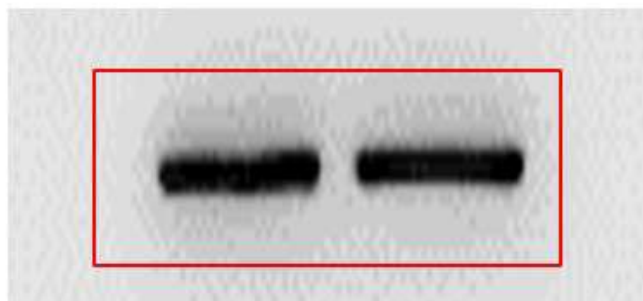

**Figure 5A**

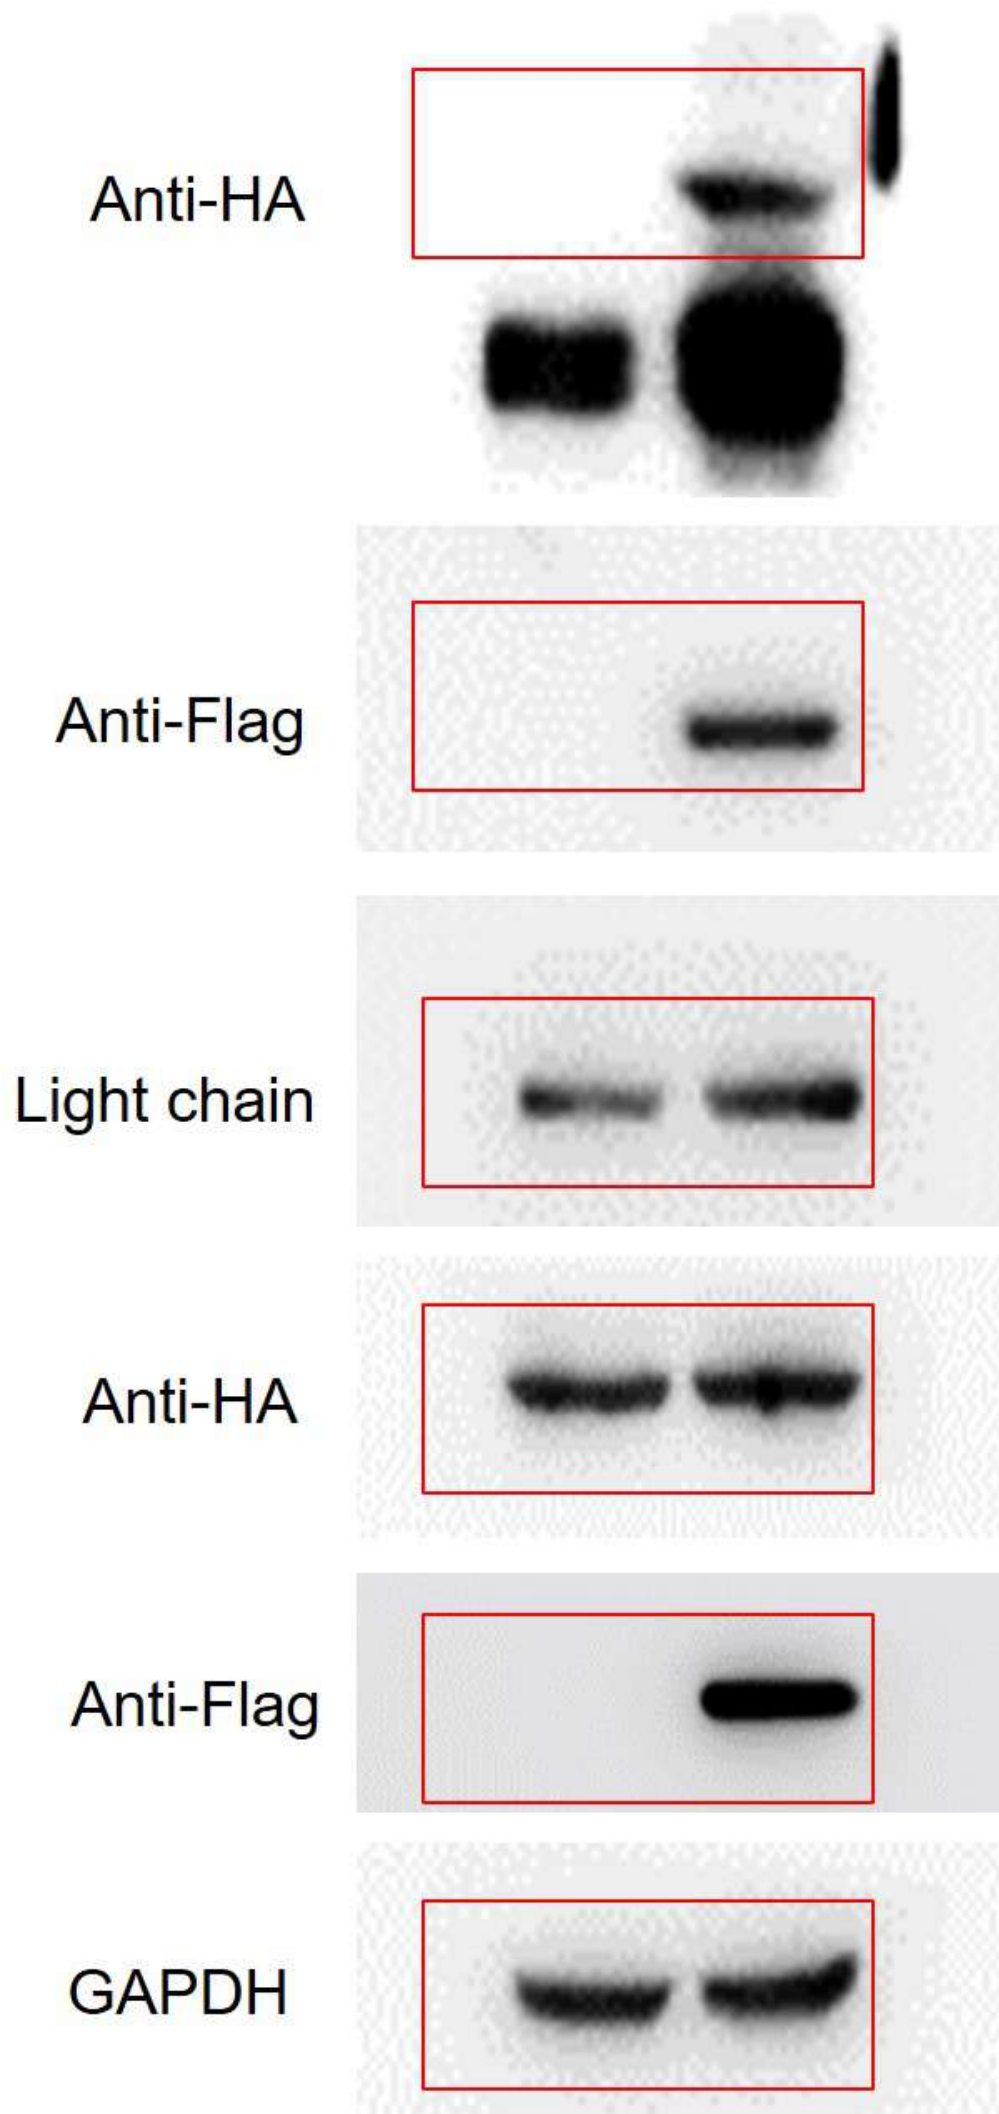

**Figure 5B**

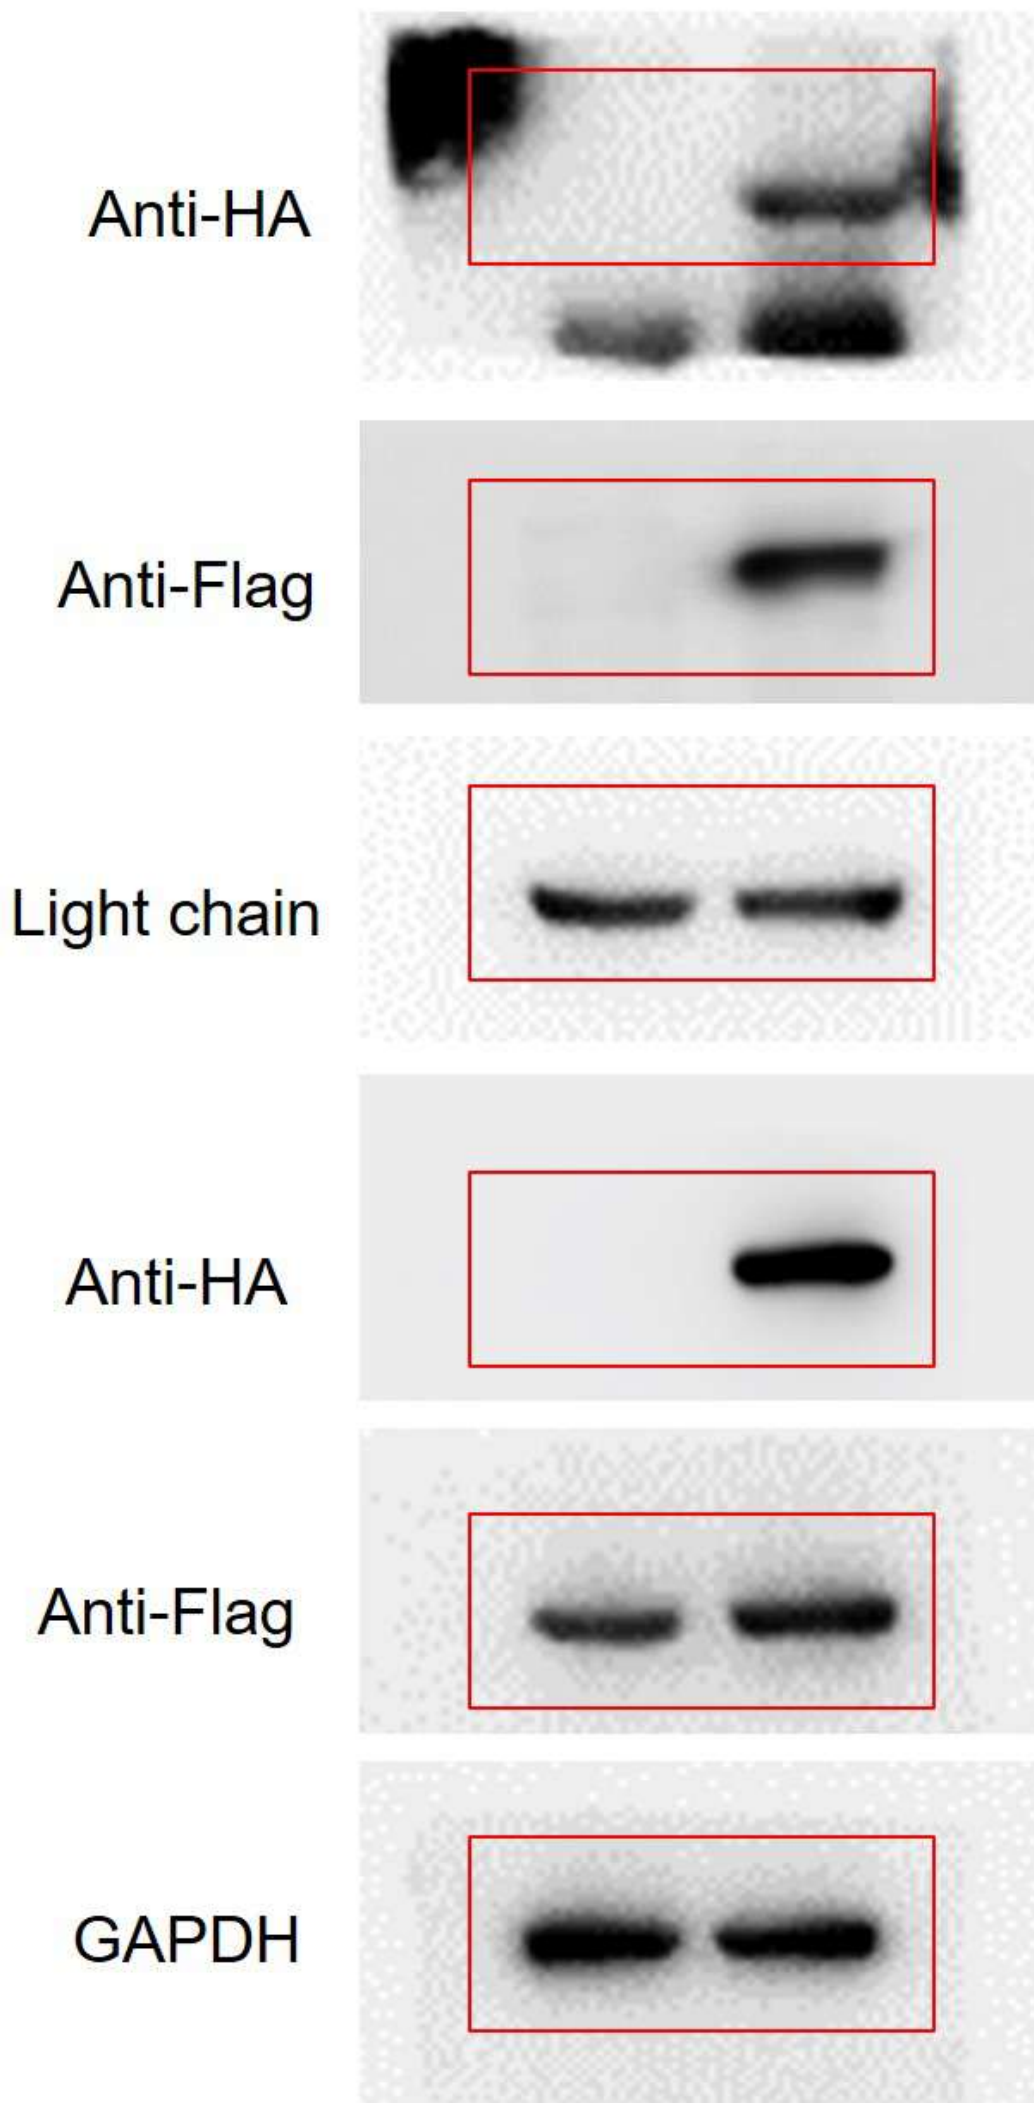

**Figure 5C**

Ace-SERBP1

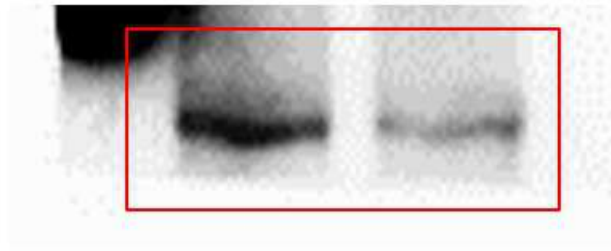

SERBP1

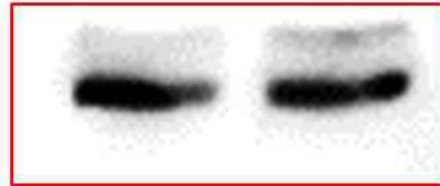

SIRT3

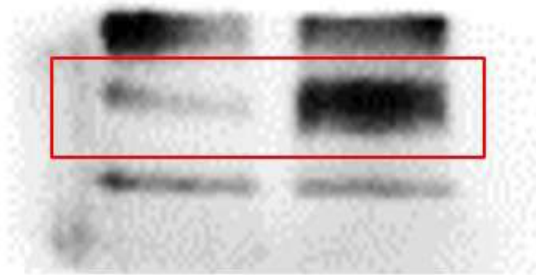

SERBP1

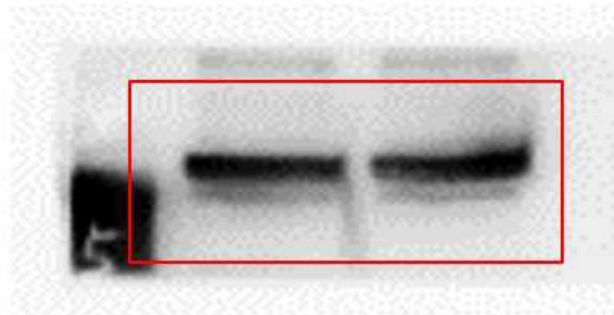

SIRT3

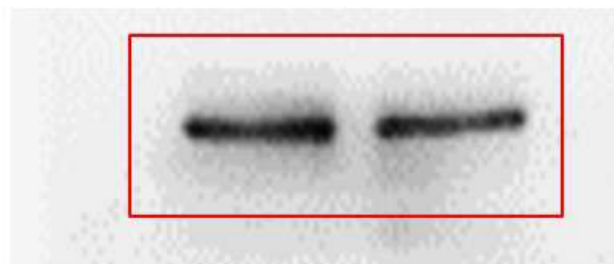

Anti-Flag

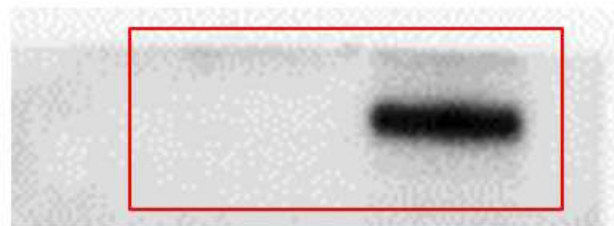

GAPDH

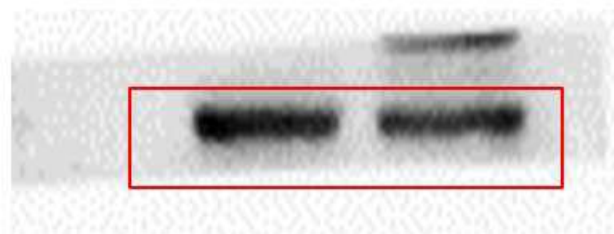

**Figure 5D**

Anti-acetylation  
lysine

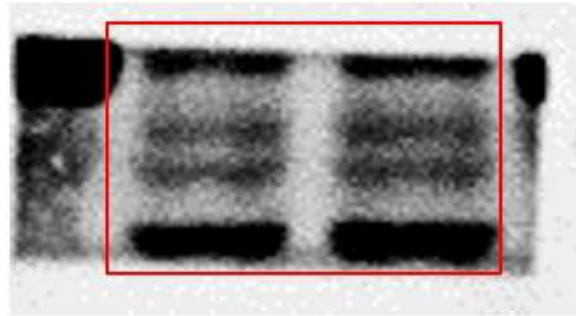

SERBP1

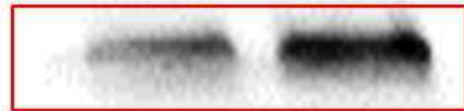

SIRT3

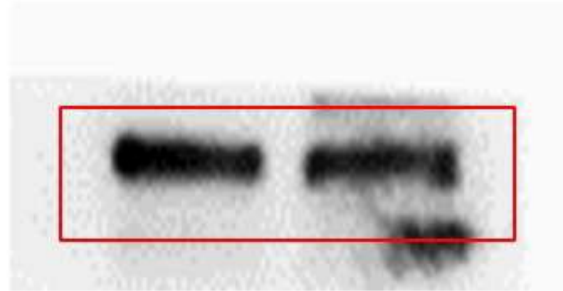

SERBP1

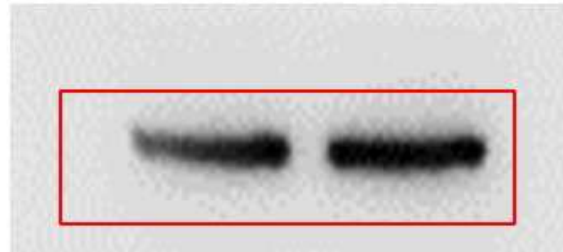

SIRT3

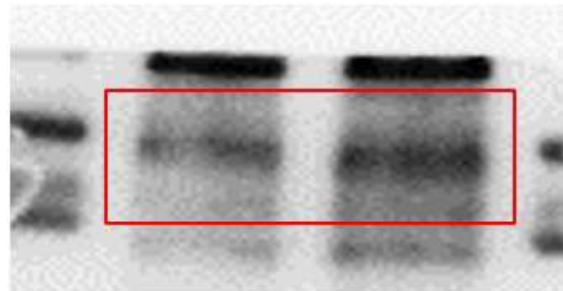

Anti-Flag

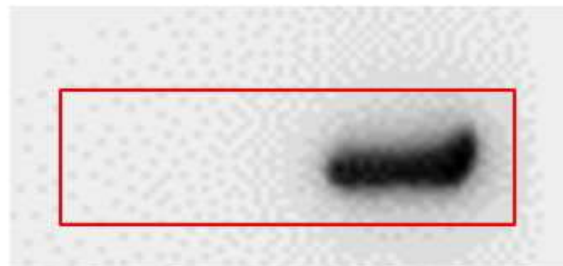

Tubulin

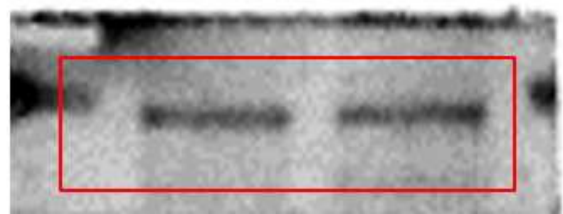

**Figure 5E**

Ace-SERBP1

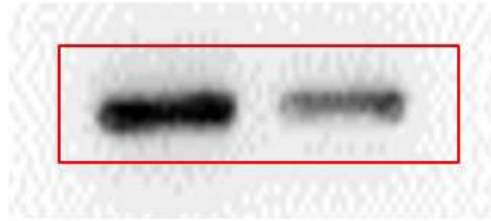

Anti-HA

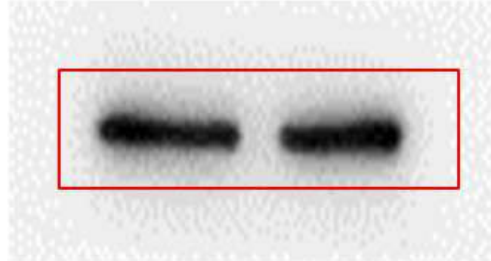

Anti-Myc

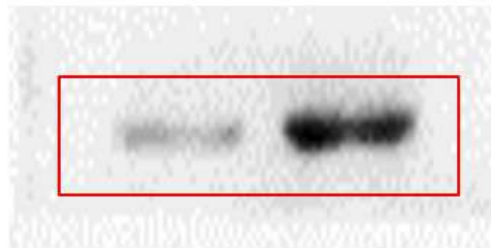

Anti-Flag

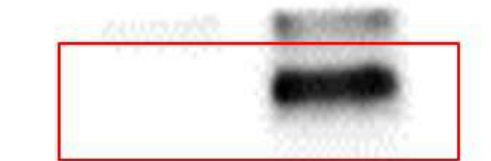

Anti-HA

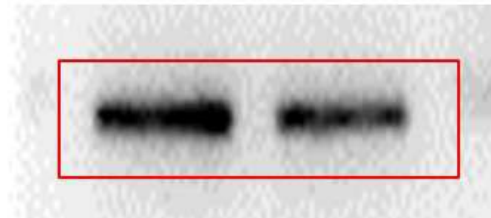

Anti-Myc

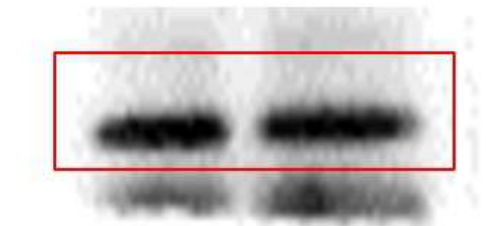

Anti-Flag

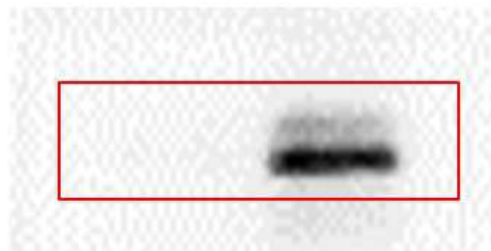

GAPDH

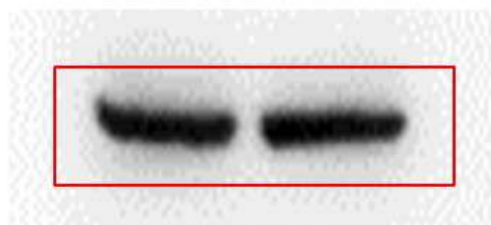

**Figure 5F**

Ace-SERBP1

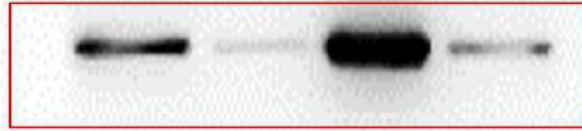

SERBP1

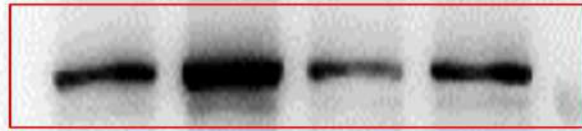

SIRT3

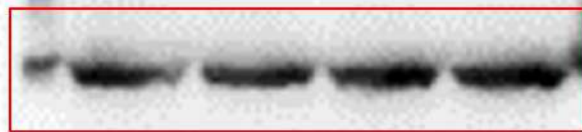

SIRT3

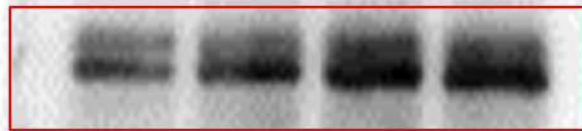

SERBP1

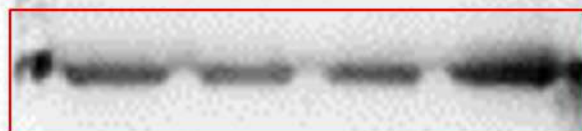

Anti-Flag

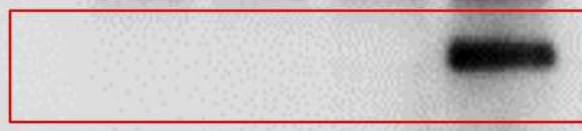

GAPDH

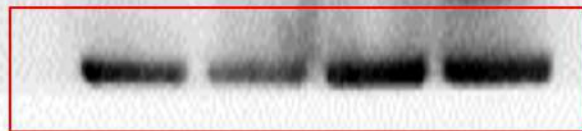

vIL-6

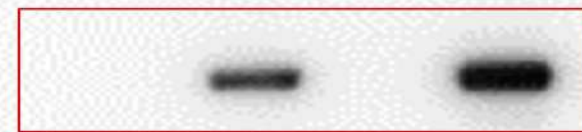

GAPDH

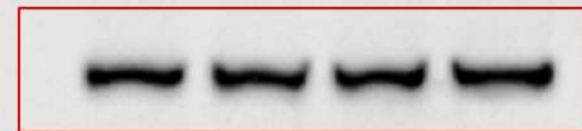



**Figure 6F**

Lipt2

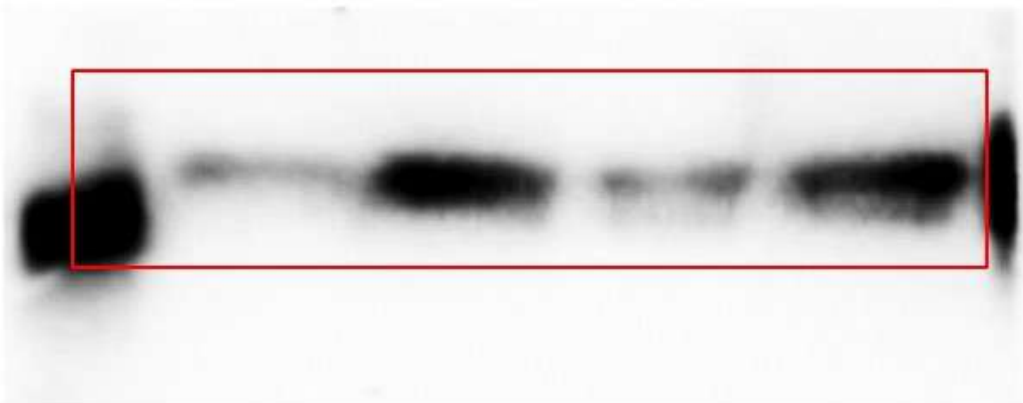

Anti-Myc

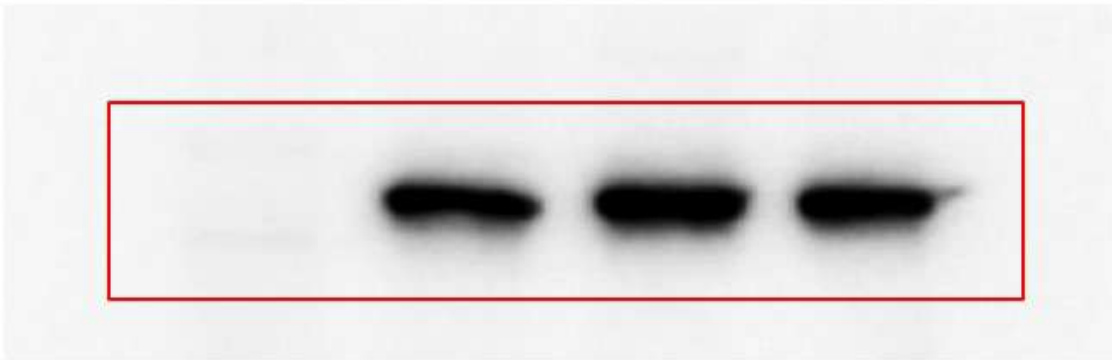

Tubulin

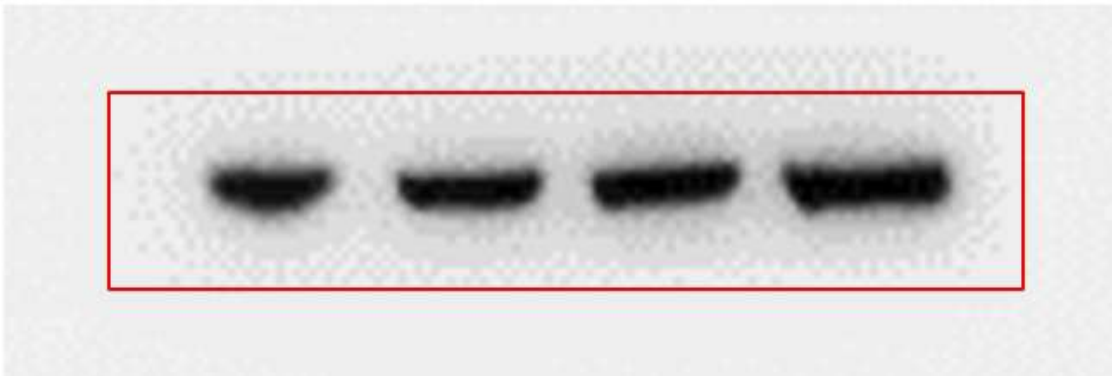

Figure 6J

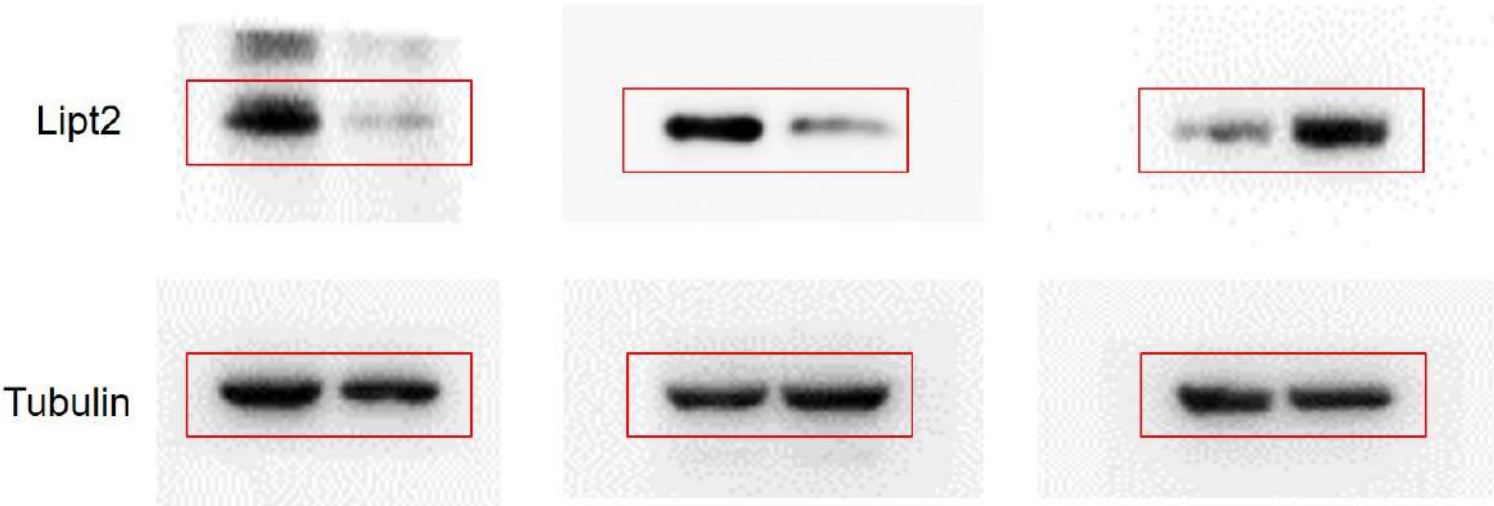

**Figure 7E**

ACSL4

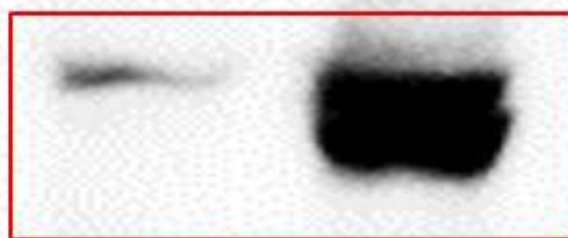

FTH1

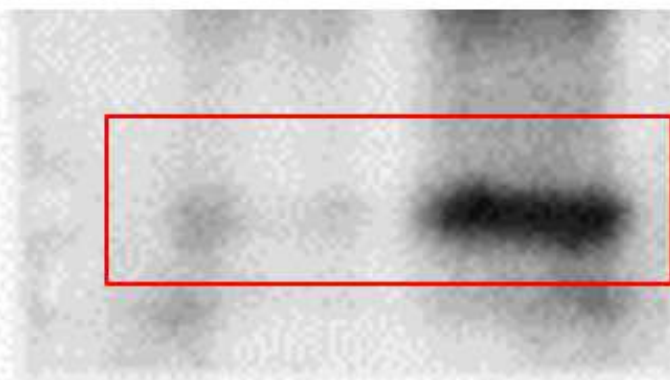

Anti-Flag

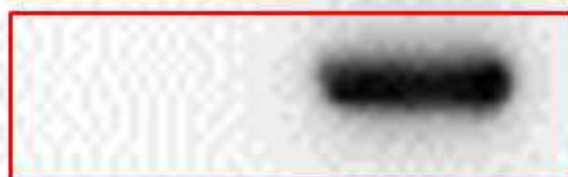

GAPDH

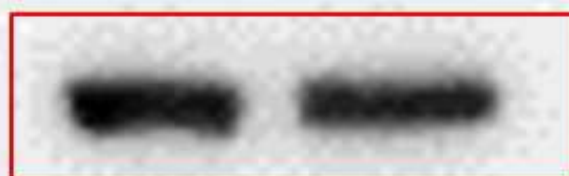

**Figure S3A**

Ace-SERBP1

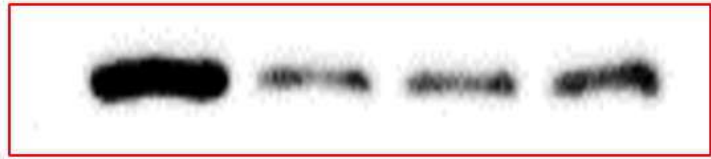

Anti-HA

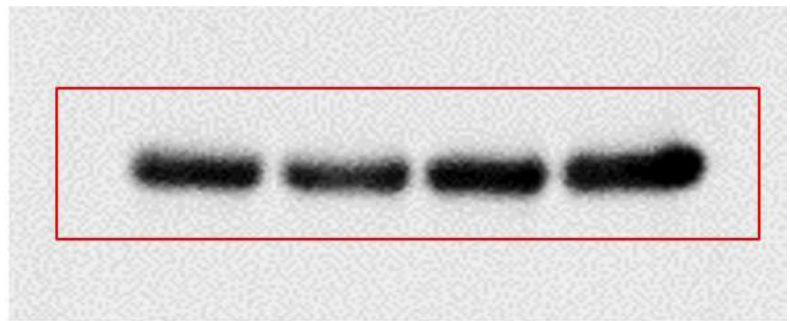

Anti-Myc

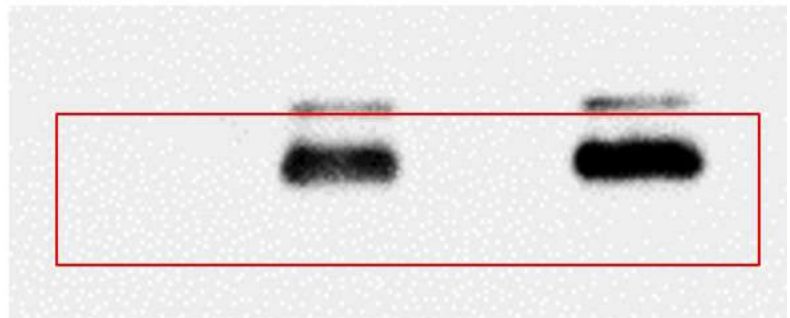

Anti-HA

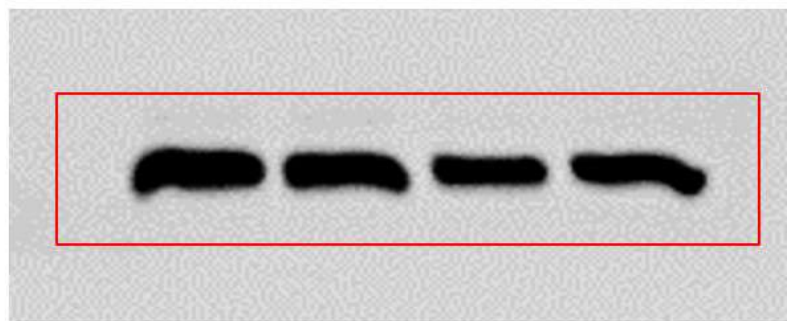

Anti-Myc

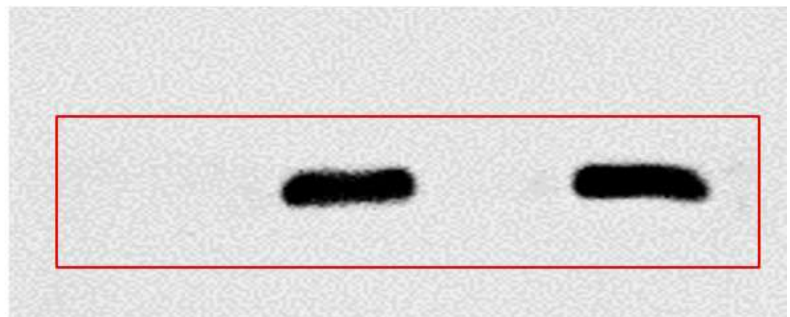

GAPDH

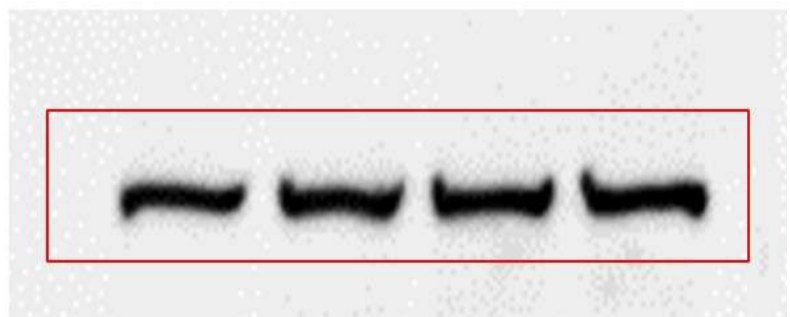

**Figure S4A**

Anti-Flag

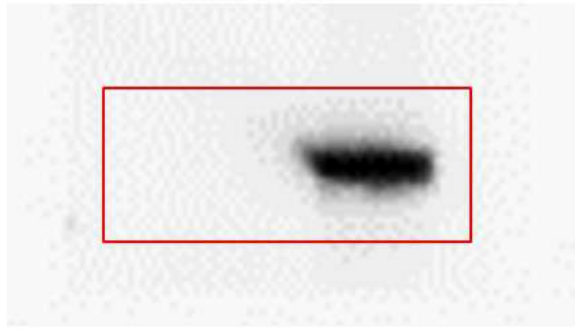

Anti-HA

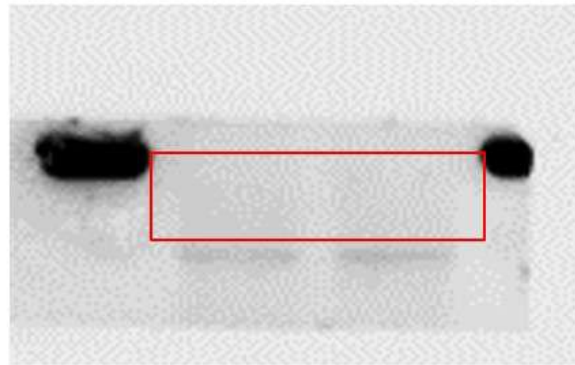

Light chain

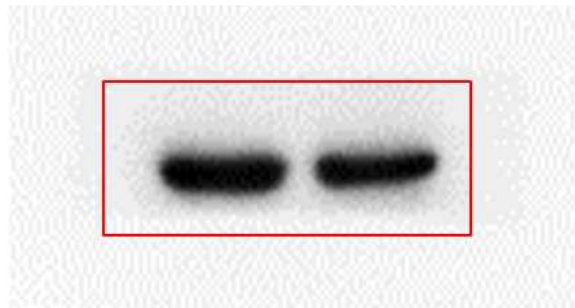

Anti-Flag

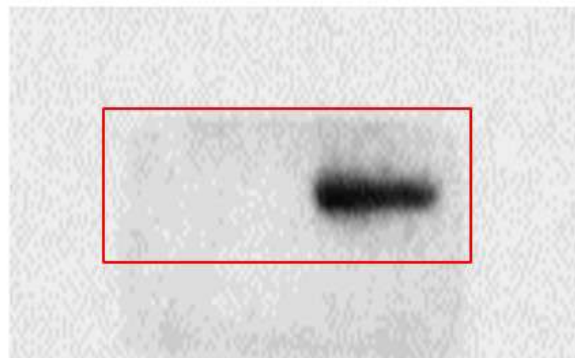

Anti-HA

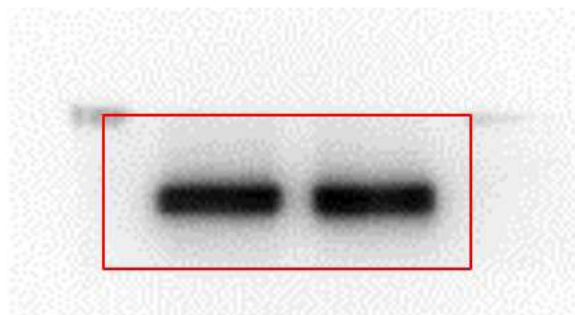

GAPDH

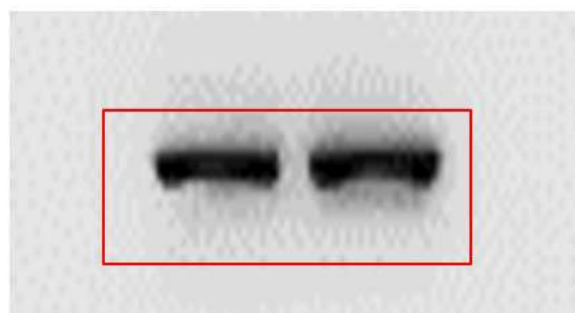

**Figure S4B**

Anti-Myc

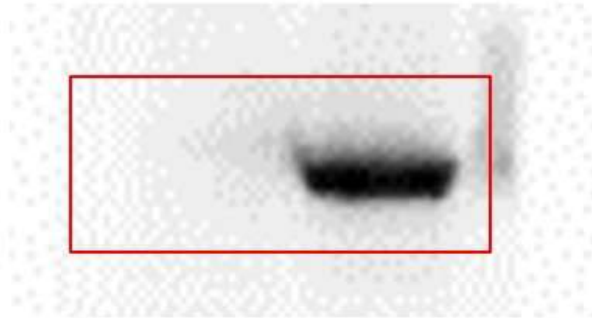

Anti-HA

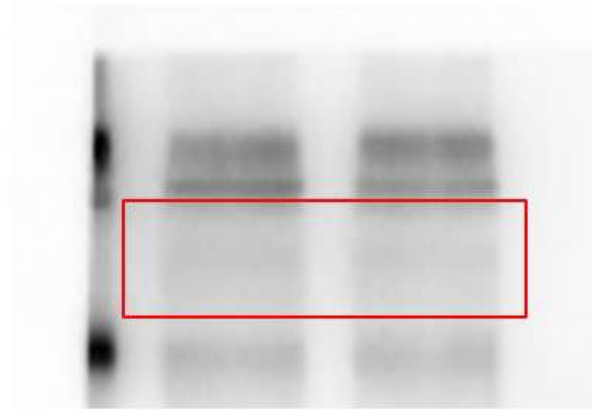

Light chain

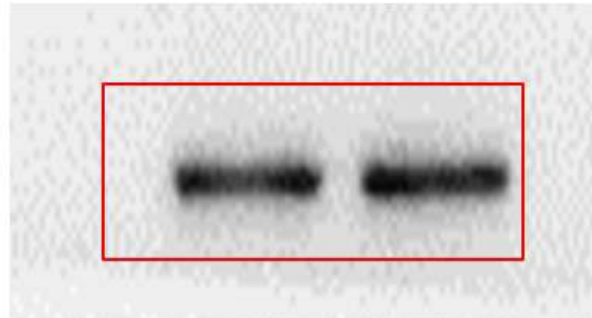

Anti-Myc

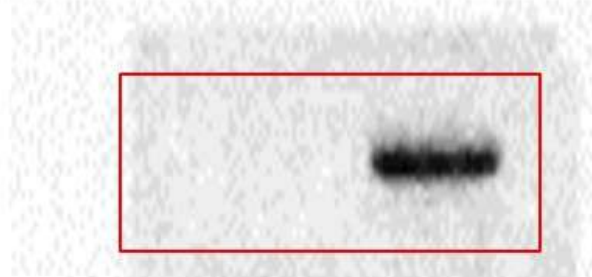

Anti-HA

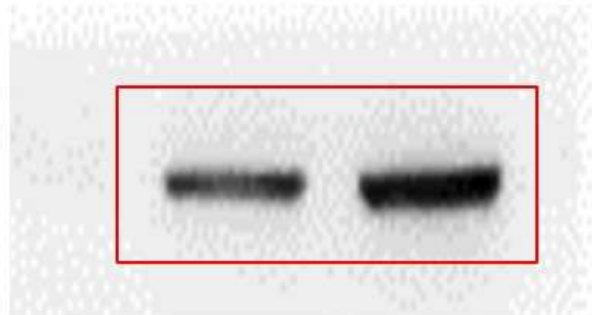

GAPDH

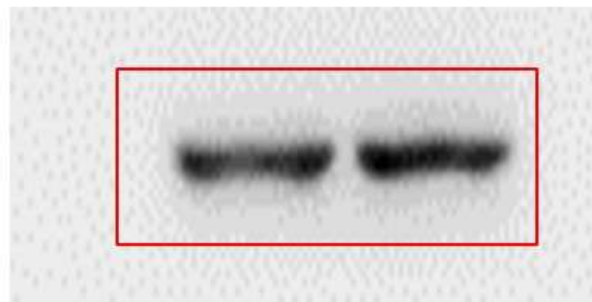

**Figure S4C**

Anti-Flag

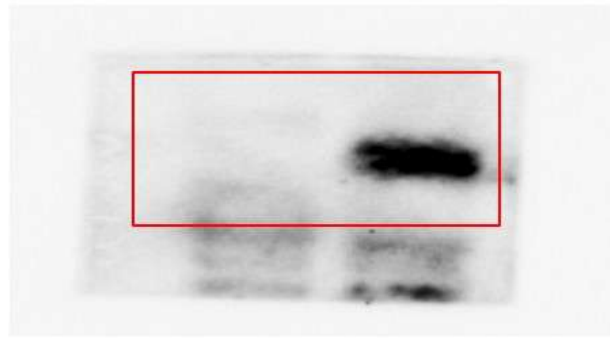

Anti-HA

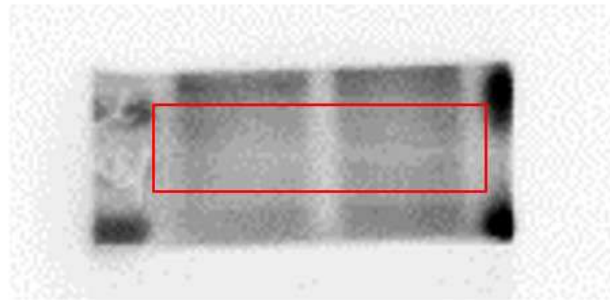

Light chain

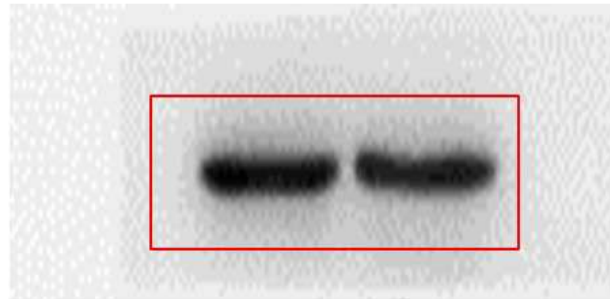

Anti-Flag

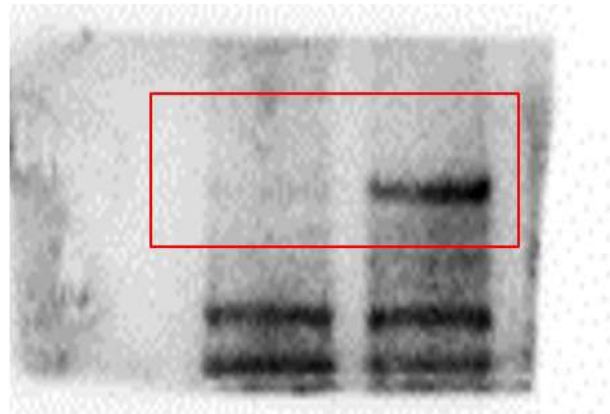

Anti-HA

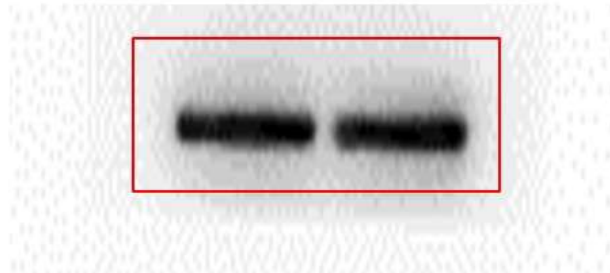

GAPDH

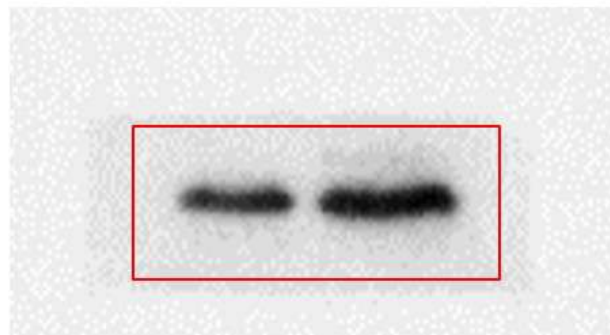

Supplement: ppat.1012082.s007.pdf [file ppat.1012082.s007.pdf]
