# Supplementary material for: KSHV vIL-6 promotes SIRT3-induced deacetylation of SERBP1 to inhibit ferroptosis and enhance cellular transformation by inducing lipoyltransferase 2 mRNA degradation
Source: PubMed Central journal article supplement (PMC10959363; doi:10.1371/journal.ppat.1012082), 2024-03-12
Supplement: ppat.1012082.s005.pdf [file ppat.1012082.s005.pdf]

**S1 Table.** The sequences of the sgRNAs.

| <b>Target</b> | <b>Sequence</b>      |
|---------------|----------------------|
| SERBP1-sgRNA  | CGGCGTGGCTGACAAAAAGG |
| SIRT3-sgRNA-1 | CCAACGTGAAAAAGGGCTTG |
| SIRT3-sgRNA-2 | GTATGACATCCCGTACCCTG |
| SIRT3-sgRNA-3 | CCTTGTCGTGAAGCAGCCGA |
