# Supplementary material for: KSHV vIL-6 promotes SIRT3-induced deacetylation of SERBP1 to inhibit ferroptosis and enhance cellular transformation by inducing lipoyltransferase 2 mRNA degradation
Source: PubMed Central journal article supplement (PMC10959363; doi:10.1371/journal.ppat.1012082), 2024-03-12
Supplement: ppat.1012082.s006.pdf [file ppat.1012082.s006.pdf]

**S2 Table.** The primers used in this study.

| <b>Target</b> | <b>Primer</b>                                                              |
|---------------|----------------------------------------------------------------------------|
| Lipt2         | F: 5'- TGCCACCCGGTGCTTGACCTG -3'<br>R: 5'- CTCGCCTAGCCAGACGCCAGT -3'       |
| Kif2          | F: 5'- ACCAACTGCGGCAAGACCTACACC-3'<br>R: 5'- GGCTTCTCACCTGTGTGCGTCCTC-3'   |
| Myom2         | F: 5'- TCTCACCTGATGCCAACTTCCG -3'<br>R: 5'- CAATAGTAAACCGATCCATGACCA -3'   |
| Ppm1d         | F: 5'- CCATCTCCATGTGCCAAGACCA -3'<br>R: 5'- CTCGAAGCATACGCTGCCTCC -3'      |
| Ntn3          | F: 5'- CTCCAAGACTGGGTGACTGCCACA -3'<br>R: 5'- GCATCGACCTCCCACCTGAAGCTC -3' |
| GAPDH         | F: 5'- GGGTGTGAACCACGAGAAAT -3'<br>R: 5'- ACTGTGGTCATGAGCCCTTC -3'         |
